# Supplementary material
Source: publisher figshare collection journal article supplement (https://gsajournals.figshare.com/ndownloader/files/18657917)
Supplement: Supplementary file 1 [file 18657917]

## Sheet: parents; melX; simX
Male genotype	Female genotype	Court?	Mate?	Proportion of time spent courting
LHM	380	Y	Y	1
LHM	380	Y	Y	0.666667
LHM	380	Y	Y	1
LHM	380	Y	Y	0.909091
LHM	380	Y	N	0.9
LHM	380	Y	Y	1
LHM	380	Y	Y	0.625
LHM	380	Y	Y	0.571429
LHM	380	Y	N	0.933333
LHM	380	Y	Y	0.7
LHM	380	Y	Y	0.933333
LHM	380	Y	Y	1
LHM	380	Y	Y	0.8
LHM	380	Y	N	0.8
LHM	380	Y	Y	0.952381
LHM	380	Y	Y	1
LHM	380	Y	Y	1
LHM	380	Y	Y	0.909091
LHM	380	Y	N	0.933333
LHM	380	Y	N	0.733333
LHM	380	Y	Y	0.777778
LHM	380	Y	Y	1
LHM	380	Y	Y	0.2
LHM	380	Y	Y	0.666667
LHM	380	Y	Y	1
LHM	380	Y	Y	1
LHM	380	Y	Y	1
LHM	380	Y	Y	1
LHM	380	Y	Y	0.5625
LHm	F1 Hybrid	Y	Y	0.392857
LHm	F1 Hybrid	Y	N	0.533333
LHm	F1 Hybrid	Y	Y	0.533333
LHm	F1 Hybrid	Y	Y	0.727273
LHm	F1 Hybrid	Y	Y	0.733333
LHm	F1 Hybrid	Y	Y	0.772727
LHm	F1 Hybrid	Y	Y	1
LHm	F1 Hybrid	N
LHM	simC4	N
LHM	simC4	Y	N	0.366667
LHM	simC4	Y	N	0.166667
LHM	simC4	N	N	0.1
LHM	simC4	Y	N	0.766667
LHM	simC4	Y	N	0.4
LHM	simC4	Y	N	0.133333
LHM	simC4	N	N	0.0333333
LHM	simC4	Y	N	0.133333
LHM	simC4	N	N	0.0666667
LHM	simC4	Y	N	1
LHM	simC4	Y	N	0.466667
LHM	simC4	Y	N	0.6
LHM	simC4	Y	N	0.866667
LHM	simC4	Y	N	0.366667
LHM	simC4	Y	N	0.766667
LHM	simC4	Y	N	0.5
LHM	simC4	Y	N	0.866667
LHM	simC4	Y	N	0.733333
LHM	simC4	Y	Y	0.964286
LHM	simC4	N	N	0.0666667
LHM	simC4	Y	N	0.866667
LHM	simC4	Y	N	0.8
LHM	simC4	N
LHM	simC4	Y	N	0.966667
LHM	simC4	Y	N	0.533333
LHM	simC4	Y	N	0.966667
LHM	simC4	N	N	0.0666667
LHM	simC4	Y	N	0.966667
LHm	SimC4	N	N	0.0333333
LHm	SimC4	N	N	0.0333333
LHm	SimC4	Y	N	0.366667
LHm	SimC4	N
LHm	SimC4	N
LHm	SimC4	N
LHm	SimC4	N
LHm	SimC4	N
simC4	380	N
simC4	380	N
simC4	380	N
simC4	380	N
simC4	380	N	N	0.0333333
simC4	380	N
simC4	380	N
simC4	380	N
simC4	380	N
simC4	380	N
simC4	380	N
simC4	380	N
simC4	380	N
simC4	380	N
simC4	380	N
simC4	380	N
simC4	380	N
simC4	380	N
simC4	380	N
simC4	380	N
simC4	380	N
simC4	380	N
simC4	380	N
simC4	380	N
simC4	380	N
simC4	380	N
simC4	380	N
simC4	380	N
simC4	380	N
simC4	380	N
simC4	simC4	Y	Y	0.166667
simC4	simC4	Y	Y	1
simC4	simC4	Y	N	0.666667
simC4	simC4	Y	Y	1
simC4	simC4	Y	Y	1
simC4	simC4	Y	Y	1
simC4	simC4	Y	Y	1
simC4	simC4	Y	Y	0.5
simC4	simC4	Y	Y	0.5
simC4	simC4	Y	Y	0.928571
simC4	simC4	Y	N	0.933333
simC4	simC4	Y	Y	0.75
simC4	simC4	Y	Y	1
simC4	simC4	N	Y	0.1
simC4	simC4	Y	Y	0.333333
simC4	simC4	N
simC4	simC4	Y	Y	0.75
simC4	simC4	Y	Y	1
simC4	simC4	N
simC4	simC4	Y	Y	1
simC4	simC4	Y	Y	1
simC4	simC4	Y	N	0.133333
simC4	simC4	Y	Y	0.333333
simC4	simC4	Y	Y	0.9
simC4	simC4	Y	Y	0.5
simC4	simC4	Y	Y	1
simC4	simC4	Y	Y	0.9375
simC4	simC4	Y	Y	0.333333
simC4	simC4	Y	Y	1
LHR	380	N
LHR	380	N
LHR	380	N
LHR	380	N
LHR	380	N
LHR	380	N
LHR	380	N
LHR	380	N
LHR	380	N	N	0.0666667
LHR	380	N
LHR	380	N
LHR	380	N
LHR	380	N	N	0.0666667
LHR	380	N
LHR	380	N
LHR	380	N
LHR	380	N
LHR	380	N
LHR	380	N
LHR	380	N
LHR	380	N
LHR	380	N
LHR	380	N
LHR	380	N
LHR	380	N
LHR	380	N
LHR	380	N
LHR	380	N
LHR	380	N
LHR	380	N
LHR	380	N
LHR	380	N
LHR	380	N
LHR	380	N
LHR	380	N
LHR	380	N
LHR	380	N
LHR	380	N
LHR	380	N
LHR	380	N	N	0.0333333
LHR	380	N
LHR	380	N
LHR	380	N
LHR	380	N
LHR	380	N
LHR	380	N
LHR	380	N
LHR	380	N
LHR	380	N
LHR	380	N
LHR	380	N
LHR	F1 hybrid	N
LHR	F1 hybrid	N
LHR	F1 hybrid	N
LHR	F1 hybrid	N
LHR	F1 hybrid	N
LHR	F1 hybrid	Y	N	0.0333333
LHR	F1 hybrid	N
LHR	F1 hybrid	N
LHR	F1 hybrid	Y	Y	0.947368
LHR	F1 hybrid	N
LHR	SimC4	N
LHR	SimC4	Y	Y	0.666667
LHR	SimC4	N
LHR	SimC4	N
LHR	SimC4	N
LHR	SimC4	Y	N	0.233333
LHR	SimC4	Y	Y	0.2
LHR	SimC4	N
LHR	SimC4	Y	Y	0.666667
LHR	SimC4	Y	N	0.133333
LHR	SimC4	N
LHR	SimC4	Y	Y	0.6
LHR	SimC4	Y	Y	0.0416667
LHR	SimC4	N
LHR	SimC4	Y	N	0.133333
LHR	SimC4	Y	N	0.0333333
LHR	SimC4	Y	Y	0.133333
LHR	SimC4	Y	Y	0.75
LHR	SimC4	Y	N	0.0666667
LHR	SimC4	Y	N	0.133333
CanS	CanS	N	N	0.0333333
CanS	CanS	N	N	0.0666667
CanS	CanS	Y	Y	0.111111
CanS	CanS	Y	Y	0.125
CanS	CanS	Y	Y	0.125
CanS	CanS	Y	Y	0.173913
CanS	CanS	Y	N	0.2
CanS	CanS	Y	Y	0.2
CanS	CanS	Y	Y	0.285714
CanS	CanS	Y	Y	0.3
CanS	CanS	Y	N	0.333333
CanS	CanS	Y	Y	0.333333
CanS	CanS	Y	Y	0.333333
CanS	CanS	Y	Y	0.333333
CanS	CanS	Y	Y	0.333333
CanS	CanS	Y	Y	0.363636
CanS	CanS	Y	N	0.366667
CanS	CanS	Y	N	0.433333
CanS	CanS	Y	Y	0.444444
CanS	CanS	Y	N	0.466667
CanS	CanS	Y	Y	0.5
CanS	CanS	Y	Y	0.5
CanS	CanS	Y	N	0.533333
CanS	CanS	Y	N	0.6
CanS	CanS	Y	Y	0.647059
CanS	CanS	Y	Y	0.75
CanS	CanS	Y	Y	0.75
CanS	CanS	Y	Y	0.777778
CanS	CanS	Y	Y	1
CanS	CanS	Y	Y	1
CanS	CanS	N	N
CanS	F1 Hybrid	N	N	0.0333333
CanS	F1 Hybrid	N	N	0.0333333
CanS	F1 Hybrid	N	N	0.0666667
CanS	F1 Hybrid	Y	N	0.133333
CanS	F1 Hybrid	Y	Y	0.166667
CanS	F1 Hybrid	Y	N	0.233333
CanS	F1 Hybrid	Y	Y	0.25
CanS	F1 Hybrid	Y	Y	0.277778
CanS	F1 Hybrid	Y	Y	0.3
CanS	F1 Hybrid	Y	Y	0.333333
CanS	F1 Hybrid	Y	Y	0.363636
CanS	F1 Hybrid	Y	Y	0.37037
CanS	F1 Hybrid	Y	Y	0.375
CanS	F1 Hybrid	Y	Y	0.384615
CanS	F1 Hybrid	Y	Y	0.384615
CanS	F1 Hybrid	Y	Y	0.428571
CanS	F1 Hybrid	Y	Y	0.470588
CanS	F1 Hybrid	Y	Y	0.5
CanS	F1 Hybrid	Y	Y	0.5
CanS	F1 Hybrid	Y	Y	0.5
CanS	F1 Hybrid	Y	N	0.533333
CanS	F1 Hybrid	Y	Y	0.545455
CanS	F1 Hybrid	Y	N	0.566667
CanS	F1 Hybrid	Y	N	0.566667
CanS	F1 Hybrid	Y	N	0.566667
CanS	F1 Hybrid	Y	N	0.766667
CanS	F1 Hybrid	Y	Y	0.777778
CanS	F1 Hybrid	N	N
CanS	F1 Hybrid	N	N
CanS	SimC4	N	N	0.0333333
CanS	SimC4	N	N	0.0333333
CanS	SimC4	N	N	0.0333333
CanS	SimC4	N	N	0.0666667
CanS	SimC4	N	N	0.0666667
CanS	SimC4	N	N	0.1
CanS	SimC4	Y	N	0.2
CanS	SimC4	Y	N	0.266667
CanS	SimC4	Y	N	0.3
CanS	SimC4	Y	N	0.333333
CanS	SimC4	Y	N	0.333333
CanS	SimC4	Y	N	0.366667
CanS	SimC4	Y	N	0.433333
CanS	SimC4	Y	N	0.466667
CanS	SimC4	Y	N	0.566667
CanS	SimC4	Y	N	0.6
CanS	SimC4	Y	N	0.6
CanS	SimC4	Y	N	0.6
CanS	SimC4	Y	N	0.633333
CanS	SimC4	Y	N	0.766667
CanS	SimC4	Y	N	0.9
CanS	SimC4	Y	N	0.9
CanS	SimC4	N	N
CanS	SimC4	N	N
CanS	SimC4	N	N
CanS	SimC4	N	N
CanS	SimC4	N	N
CanS	SimC4	N	N
CanS	SimC4	N	N
CanS	SimC4	N	N
SimC4	CanS	N	N	0.0333333
SimC4	CanS	N	N	0.0333333
SimC4	CanS	N	N
SimC4	CanS	N	N
SimC4	CanS	N	N
SimC4	CanS	N	N
SimC4	CanS	N	N
SimC4	CanS	N	N
SimC4	CanS	N	N
SimC4	CanS	N	N
SimC4	CanS	N	N
SimC4	CanS	N	N
SimC4	CanS	N	N
SimC4	CanS	N	N
SimC4	CanS	N	N
SimC4	CanS	N	N
SimC4	CanS	N	N
SimC4	CanS	N	N
SimC4	CanS	N	N
SimC4	CanS	N	N
SimC4	CanS	N	N
SimC4	CanS	N	N
SimC4	CanS	N	N
SimC4	CanS	N	N
SimC4	CanS	N	N
SimC4	CanS	N	N
SimC4	CanS	N	N
SimC4	F1 Hybrid	N	N	0.0333333
SimC4	F1 Hybrid	Y	Y	0.0740741
SimC4	F1 Hybrid	N	N	0.1
SimC4	F1 Hybrid	N	N	0.1
SimC4	F1 Hybrid	Y	Y	0.142857
SimC4	F1 Hybrid	y	Y	0.2
SimC4	F1 Hybrid	Y	Y	0.363636
SimC4	F1 Hybrid	Y	Y	0.833333
SimC4	F1 Hybrid	N	N
SimC4	F1 Hybrid	N	N
SimC4	F1 Hybrid	N	N
SimC4	F1 Hybrid	N	N
SimC4	F1 Hybrid	N	N
SimC4	F1 Hybrid	N	N
SimC4	F1 Hybrid	N	N
SimC4	F1 Hybrid	N	N
SimC4	F1 Hybrid	N	N
SimC4	F1 Hybrid	N	N
SimC4	F1 Hybrid	N	N
SimC4	F1 Hybrid	N	N
SimC4	F1 Hybrid	N	N
SimC4	F1 Hybrid	N	N
SimC4	F1 Hybrid	N	N
SimC4	F1 Hybrid	N	N
SimC4	F1 Hybrid	N	N
SimC4	F1 Hybrid	N	N
SimC4	F1 Hybrid	N	N
SimC4	F1 Hybrid	N	N
SimC4	F1 Hybrid	N	N
SimC4	SimC4	N	N	0.0333333
SimC4	SimC4	N	N	0.0333333
SimC4	SimC4	Y	Y	0.125
SimC4	SimC4	Y	Y	0.142857
SimC4	SimC4	Y	Y	0.25
SimC4	SimC4	Y	Y	0.25
SimC4	SimC4	Y	Y	0.333333
SimC4	SimC4	Y	Y	0.333333
SimC4	SimC4	Y	Y	0.333333
SimC4	SimC4	Y	Y	0.4
SimC4	SimC4	Y	Y	0.5
SimC4	SimC4	Y	Y	0.5
SimC4	SimC4	Y	Y	0.5
SimC4	SimC4	Y	Y	0.5
SimC4	SimC4	Y	Y	0.5
SimC4	SimC4	Y	Y	0.666667
SimC4	SimC4	Y	Y	0.714286
SimC4	SimC4	Y	Y	0.75
SimC4	SimC4	Y	Y	0.8
SimC4	SimC4	Y	Y	1
SimC4	SimC4	Y	Y	1
SimC4	SimC4	N	N
SimC4	SimC4	N	N
SimC4	SimC4	N	N
SimC4	SimC4	N	N
SimC4	SimC4	N	N
SimC4	SimC4	N	N
SimC4	SimC4	N	N
SimC4	SimC4	N	N
melX	CanS	N
melX	CanS	Y	Y	0.5
melX	CanS	Y	N	0.7
melX	CanS	Y	Y	0.230769
melX	CanS	Y	N	0.666667
melX	CanS	Y	Y	0.277778
melX	CanS	N
melX	CanS	Y	Y	0.04
melX	CanS	N
melX	CanS	Y	N	0.4
melX	CanS	Y	N	0.2
melX	CanS	Y	Y	0.6
melX	CanS	Y	Y	0.615385
melX	CanS	N
melX	CanS	Y	Y	0.5
melX	CanS	Y	Y	0.84
melX	CanS	Y	Y	0.2
melX	CanS	N
melX	CanS	N	N	0.0666667
melX	CanS	N	N	0.0666667
melX	CanS	Y	N	0.7
melX	CanS	Y	Y	0.8
melX	CanS	N
melX	CanS	N	N	0.0666667
melX	CanS	Y	Y	0.384615
melX	CanS	Y	N	0.566667
melX	CanS	Y	N	0.357143
melX	CanS	N
melX	CanS	Y	Y	0.333333
melX	CanS	N
melX	CanS	Y	Y	0.545455
melX	CanS	N
melX	CanS	N
melX	CanS	Y	Y	0.818182
melX	CanS	Y	Y	1
melX	CanS	Y	Y	0.631579
melX	CanS	N
melX	CanS	N	N	0.0666667
melX	CanS	Y	Y	0.615385
melX	CanS	Y	N	0.133333
melX	CanS	Y	Y	0.571429
melX	CanS	Y	Y	0.142857
melX	CanS	Y	Y	0.3
melX	CanS	Y	Y	0.611111
melX	CanS	Y	Y	1
melX	CanS	N
melX	CanS	N	N	0.0666667
melX	CanS	Y	N	0.2
melX	CanS	Y	N	0.266667
melX	CanS	Y	N	0.633333
melX	CanS	N
melX	CanS	N
melX	CanS	Y	Y	0.5
melX	CanS	N
melX	CanS	Y	Y	0.666667
melX	CanS	Y	Y	0.538462
melX	CanS	Y	Y	0.666667
melX	CanS	N
melX	CanS	N
melX	CanS	N
melX	F1 Hybrid	Y	Y	0.454545
melX	F1 Hybrid	N
melX	F1 Hybrid	N
melX	F1 Hybrid	Y	Y	0.5
melX	F1 Hybrid	N
melX	F1 Hybrid	N
melX	F1 Hybrid	Y	N	0.433333
melX	F1 Hybrid	Y	Y	0.714286
melX	F1 Hybrid	Y	Y	0.5
melX	F1 Hybrid	N	N	0.0333333
melX	F1 Hybrid	Y	Y	0.333333
melX	F1 Hybrid	Y	Y	0.333333
melX	F1 Hybrid	Y	Y	0.555556
melX	F1 Hybrid	Y	N	0.466667
melX	F1 Hybrid	Y	Y	0.777778
melX	F1 Hybrid	Y	Y	0.75
melX	F1 Hybrid	Y	Y	0.909091
melX	F1 Hybrid	N
melX	F1 Hybrid	Y	Y	1
melX	F1 Hybrid	N
melX	F1 Hybrid	Y	N	0.133333
melX	F1 Hybrid	Y	Y	0.133333
melX	F1 Hybrid	Y	Y	0.65
melX	F1 Hybrid	Y	Y	0.6
melX	F1 Hybrid	Y	Y	0.772727
melX	F1 Hybrid	N
melX	F1 Hybrid	Y	Y	0.294118
melX	F1 Hybrid	Y	N	0.566667
melX	F1 Hybrid	N
melX	F1 Hybrid	N	N	0.1
melX	F1 Hybrid	N
melX	F1 Hybrid	N	N	0.0333333
melX	F1 Hybrid	N	N	0.0333333
melX	F1 Hybrid	Y	Y	0.4
melX	F1 Hybrid	N
melX	F1 Hybrid	Y	Y	0.866667
melX	F1 Hybrid	Y	Y	0.416667
melX	F1 Hybrid	Y	Y	0.615385
melX	F1 Hybrid	Y	Y	0.4
melX	F1 Hybrid	N	N	0.0666667
melX	F1 Hybrid	Y	Y	0.416667
melX	F1 Hybrid	Y	N	0.733333
melX	F1 Hybrid	Y	N	0.866667
melX	F1 Hybrid	Y	Y	0.166667
melX	F1 Hybrid	N	N	0.0666667
melX	F1 Hybrid	Y	Y	0.666667
melX	F1 Hybrid	Y	N	0.5
melX	F1 Hybrid	N	N	0.0666667
melX	F1 Hybrid	N
melX	F1 Hybrid	Y	Y	0.666667
melX	F1 Hybrid	Y	Y	0.117647
melX	F1 Hybrid	Y	Y	0.8
melX	F1 Hybrid	Y	Y	0.1
melX	F1 Hybrid	Y	Y	0.333333
melX	F1 Hybrid	Y	Y	1
melX	F1 Hybrid	N
melX	F1 Hybrid	Y	Y	0.1
melX	F1 Hybrid	Y	Y	0.0952381
melX	SimC4	Y	Y	1
melX	SimC4	N
melX	SimC4	N
melX	SimC4	N
melX	SimC4	Y	Y	0.266667
melX	SimC4	Y	Y	0.75
melX	SimC4	N
melX	SimC4	N
melX	SimC4	N
melX	SimC4	N
melX	SimC4	Y	N	0.366667
melX	SimC4	N
melX	SimC4	N	N	0.0333333
melX	SimC4	N
melX	SimC4	N
melX	SimC4	N
melX	SimC4	N
melX	SimC4	N
melX	SimC4	N
melX	SimC4	N
melX	SimC4	N
melX	SimC4	N
melX	SimC4	N
melX	SimC4	Y	Y	0.5
melX	SimC4	Y	Y	0.6
melX	SimC4	Y	y	1
melX	SimC4	N
melX	SimC4	N
melX	SimC4	N	N	0.0333333
melX	SimC4	N
melX	SimC4	N
melX	SimC4	Y	N	0.366667
melX	SimC4	Y	Y	0.0434783
melX	SimC4	Y	Y	1
melX	SimC4	Y	Y	0.25
melX	SimC4	Y	Y	0.388889
melX	SimC4	N
melX	SimC4	N
melX	SimC4	N
melX	SimC4	Y	Y	0.2
melX	SimC4	Y	N	0.166667
melX	SimC4	N
melX	SimC4	N
melX	SimC4	N
melX	SimC4	N
melX	SimC4	Y	Y	0.117647
melX	SimC4	N
melX	SimC4	Y	N	0.233333
melX	SimC4	N
melX	SimC4	Y	Y	0.0588235
melX	SimC4	Y	Y	0.16
melX	SimC4	Y	Y	0.0555556
melX	SimC4	Y	Y	0.5
melX	SimC4	N
melX	SimC4	N
melX	SimC4	Y	Y	0.666667
melX	SimC4	Y	Y	1
melX	SimC4	Y	Y	1
melX	SimC4	N
melX	SimC4	N
simX	CanS	N
simX	CanS	N
simX	CanS	N
simX	CanS	N
simX	CanS	N
simX	CanS	N
simX	CanS	N
simX	CanS	Y	Y	1
simX	CanS	N
simX	CanS	N
simX	CanS	N
simX	CanS	N
simX	CanS	N
simX	CanS	N
simX	CanS	N
simX	CanS	N
simX	CanS	N
simX	CanS	N
simX	CanS	N
simX	CanS	N	N	0.0666667
simX	CanS	N
simX	CanS	N
simX	CanS	N
simX	CanS	N
simX	CanS	N
simX	CanS	N
simX	CanS	N
simX	CanS	N
simX	CanS	N
simX	CanS	N
simX	CanS	N
simX	CanS	N
simX	CanS	N
simX	CanS	N
simX	CanS	N
simX	CanS	N
simX	CanS	N
simX	CanS	N
simX	CanS	N
simX	CanS	N
simX	CanS	N
simX	CanS	N
simX	CanS	N
simX	CanS	N
simX	CanS	N
simX	CanS	N
simX	CanS	N
simX	CanS	N
simX	CanS	N	N	0.0333333
simX	CanS	N
simX	CanS	N
simX	CanS	N
simX	CanS	N
simX	CanS	N
simX	CanS	N
simX	CanS	N
simX	CanS	N
simX	F1 Hybrid	Y	Y	0.125
simX	F1 Hybrid	N
simX	F1 Hybrid	Y	Y	1
simX	F1 Hybrid	Y	Y	0.142857
simX	F1 Hybrid	N
simX	F1 Hybrid	N
simX	F1 Hybrid	Y	Y	0.666667
simX	F1 Hybrid	N
simX	F1 Hybrid	N
simX	F1 Hybrid	Y	Y	0.105263
simX	F1 Hybrid	Y	Y	0.428571
simX	F1 Hybrid	Y	Y	0.6
simX	F1 Hybrid	N
simX	F1 Hybrid	N	N	0.0333333
simX	F1 Hybrid	N
simX	F1 Hybrid	Y	Y	0.434783
simX	F1 Hybrid	Y	Y	0.666667
simX	F1 Hybrid	N
simX	F1 Hybrid	N
simX	F1 Hybrid	Y	N	0.133333
simX	F1 Hybrid	Y	Y	0.571429
simX	F1 Hybrid	N
simX	F1 Hybrid	N	N	0.0666667
simX	F1 Hybrid	N
simX	F1 Hybrid	Y	Y	0.0454545
simX	F1 Hybrid	N
simX	F1 Hybrid	Y	Y	0.2
simX	F1 Hybrid	N
simX	F1 Hybrid	N
simX	F1 Hybrid	Y	Y	0.3
simX	F1 Hybrid	N
simX	F1 Hybrid	N
simX	F1 Hybrid	Y	Y	0.0588235
simX	F1 Hybrid	Y	Y	0.5
simX	F1 Hybrid	N
simX	F1 Hybrid	N
simX	F1 Hybrid	N
simX	F1 Hybrid	N
simX	F1 Hybrid	N
simX	F1 Hybrid	N
simX	F1 Hybrid	N
simX	F1 Hybrid	N
simX	F1 Hybrid	N
simX	F1 Hybrid	N	N	0.0333333
simX	F1 Hybrid	N	N	0.0333333
simX	F1 Hybrid	N	N	0.0333333
simX	F1 Hybrid	Y	Y	0.692308
simX	F1 Hybrid	N
simX	F1 Hybrid	N
simX	F1 Hybrid	Y	Y	0.157895
simX	F1 Hybrid	N
simX	F1 Hybrid	N
simX	F1 Hybrid	N
simX	F1 Hybrid	N	N	0.0666667
simX	F1 Hybrid	Y	Y	0.2
simX	F1 Hybrid	N
simX	F1 Hybrid	N
simX	SimC4	Y	Y	1
simX	SimC4	Y	Y	1
simX	SimC4	Y	Y	0.333333
simX	SimC4	Y	N	0.633333
simX	SimC4	Y	Y	0.5
simX	SimC4	Y	Y	0.833333
simX	SimC4	Y	Y	0.4
simX	SimC4	N
simX	SimC4	Y	Y	0.105263
simX	SimC4	Y	Y	1
simX	SimC4	Y	Y	0.363636
simX	SimC4	Y	Y	0.444444
simX	SimC4	Y	Y	0.444444
simX	SimC4	Y	Y	0.4
simX	SimC4	Y	Y	0.916667
simX	SimC4	Y	Y	0.8
simX	SimC4	Y	Y	0.727273
simX	SimC4	N
simX	SimC4	Y	N	0.766667
simX	SimC4	Y	Y	1
simX	SimC4	N	N	0.0333333
simX	SimC4	Y	Y	0.5
simX	SimC4	Y	N	0.233333
simX	SimC4	Y	Y	0.4
simX	SimC4	Y	Y	1
simX	SimC4	Y	Y	1
simX	SimC4	Y	Y	0.142857
simX	SimC4	Y	Y	0.166667
simX	SimC4	Y	Y	0.5
simX	SimC4	Y	Y	0.714286
simX	SimC4	N
simX	SimC4	Y	Y	0.444444
simX	SimC4	Y	Y	0.5
simX	SimC4	Y	Y	0.6
simX	SimC4	Y	Y	1
simX	SimC4	Y	Y	1
simX	SimC4	Y	Y	1
simX	SimC4	Y	Y	0.153846
simX	SimC4	Y	Y	0.833333
simX	SimC4	Y	Y	0.666667
simX	SimC4	Y	y	0.2
simX	SimC4	Y	N	0.666667
simX	SimC4	N
simX	SimC4	Y	Y	0.0714286
simX	SimC4	Y	Y	0.4
simX	SimC4	Y	Y	1
simX	SimC4	Y	Y	0.3
simX	SimC4	Y	Y	0.375
simX	SimC4	Y	Y	0.2
simX	SimC4	Y	Y	0.5
simX	SimC4	Y	Y	0.117647
simX	SimC4	Y	N	0.466667
simX	SimC4	Y	N	0.533333
simX	SimC4	Y	Y	0.714286
simX	SimC4	Y	Y	1
simX	SimC4	Y	Y	0.333333
simX	SimC4	Y	N	0.25
simX	SimC4	N
simX	SimC4	Y	Y	0.333333
melX	CanS	N
melX	CanS	Y		0
melX	CanS	Y		3
melX	CanS	Y		2
melX	CanS	Y		0
melX	CanS	N
melX	CanS	N		0
melX	CanS	N		0
melX	CanS	N
melX	CanS	Y		1
melX	CanS	N
melX	CanS	N
melX	CanS	N
melX	CanS	Y		0
melX	CanS	Y		2
melX	CanS	N
melX	CanS	N
melX	CanS	N
melX	CanS	Y		1
melX	CanS	Y		1
melX	CanS	N
melX	CanS	Y		0
melX	CanS	N
melX	CanS	N
melX	CanS	N
melX	CanS	N
melX	CanS	N
melX	CanS	N		0
melX	F1 hybrid	N
melX	F1 hybrid	Y		1
melX	F1 hybrid	N
melX	F1 hybrid	N
melX	F1 hybrid	Y		2
melX	F1 hybrid	N
melX	F1 hybrid	Y		2
melX	F1 hybrid	N
melX	F1 hybrid	Y		1
melX	F1 hybrid	Y		0
melX	F1 hybrid	Y		1
melX	F1 hybrid	N
melX	F1 hybrid	N
melX	F1 hybrid	N		0
melX	F1 hybrid	Y		1
melX	F1 hybrid	Y		1
melX	F1 hybrid	N		0
melX	F1 hybrid	Y		1
melX	F1 hybrid	Y		11
melX	F1 hybrid	N
melX	F1 hybrid	N
melX	F1 hybrid	Y		9
melX	F1 hybrid	N
melX	F1 hybrid	Y		5
melX	F1 hybrid	N
melX	F1 hybrid	N
melX	F1 hybrid	N
melX	F1 hybrid	N
melX	SimC4	N
melX	SimC4	N
melX	SimC4	N	Dying
melX	SimC4	N
melX	SimC4	N
melX	SimC4	N
melX	SimC4	N
melX	SimC4	Y		3
melX	SimC4	N
melX	SimC4	N
melX	SimC4	N
melX	SimC4	N		0
melX	SimC4	N
melX	SimC4	N
melX	SimC4	N
melX	SimC4	N
melX	SimC4	Y		0
melX	SimC4	N
melX	SimC4	N		0
melX	SimC4	N		1
melX	SimC4	N
melX	SimC4	N		0
melX	SimC4	N
melX	SimC4	N
melX	SimC4	N
melX	SimC4	N
simX	CanS	N
simX	CanS	N
simX	CanS	N
simX	CanS	N
simX	CanS	N
simX	CanS	N
simX	CanS	N
simX	CanS	N
simX	CanS	N
simX	CanS	N
simX	CanS	N
simX	CanS	N
simX	CanS	N
simX	CanS	N
simX	CanS	N
simX	CanS	N
simX	CanS	N
simX	CanS	N
simX	CanS	N
simX	CanS	N
simX	CanS	N
simX	CanS	N
simX	CanS	N
simX	CanS	N
simX	CanS	N
simX	CanS	N
simX	CanS	N
simX	CanS	Y		0
simX	CanS	Y		0
simX	F1 hybrid	N
simX	F1 hybrid	N
simX	F1 hybrid	N
simX	F1 hybrid	N		0
simX	F1 hybrid	Y		3
simX	F1 hybrid	Y		2
simX	F1 hybrid	N
simX	F1 hybrid	Y		1
simX	F1 hybrid	Y		1
simX	F1 hybrid	Y	female sick	0
simX	F1 hybrid	N
simX	F1 hybrid	N
simX	F1 hybrid	N
simX	F1 hybrid	N
simX	F1 hybrid	Y		0
simX	F1 hybrid	Y		1
simX	F1 hybrid	N
simX	F1 hybrid	N
simX	F1 hybrid	N
simX	F1 hybrid	N
simX	F1 hybrid	N
simX	F1 hybrid	N
simX	F1 hybrid	N
simX	F1 hybrid	N
simX	F1 hybrid	N
simX	F1 hybrid	N
simX	F1 hybrid	N
simX	F1 hybrid	N
simX	F1 hybrid	N
simX	F1 hybrid	N
simX	SimC4	N
simX	SimC4	Y		2
simX	SimC4	Y		2
simX	SimC4	Y		2
simX	SimC4	Y		4
simX	SimC4	Y		3
simX	SimC4	Y		2
simX	SimC4	Y		4
simX	SimC4	N
simX	SimC4	Y		1
simX	SimC4	Y		1
simX	SimC4	Y		1
simX	SimC4	Y		1
simX	SimC4	Y		5
simX	SimC4	Y		1
simX	SimC4	Y		1
simX	SimC4	N
simX	SimC4	Y		1
simX	SimC4	Y		1
simX	SimC4	Y		1
simX	SimC4	Y		1
simX	SimC4	Y		1
simX	SimC4	Y		5
simX	SimC4	Y		1
simX	SimC4	Y		6
simX	SimC4	Y		2

## Sheet: DP(1;Y) hybrids
Male genotype	Female Genotype	Court?	Mate?	Proportion Time Spent Courting
DP-1 Hybrid	CanS	N
DP-1 Hybrid	CanS	N					KEY
DP-1 Hybrid	CanS	N
DP-1 Hybrid	CanS	N					BSC296	DP-1 hybrid
DP-1 Hybrid	CanS	N					BSC74	DP-2 hybrid
DP-1 Hybrid	CanS	N					BSC158	DP-3 hybrid
DP-1 Hybrid	CanS	N					BSC277	DP-4 hybrid
DP-1 Hybrid	CanS	N					BSC33	DP-6 hybrid
DP-1 Hybrid	CanS	N					BSC170	DP-7 hybrid
DP-1 Hybrid	CanS	N					BSC58	DP-8a hybrid
DP-1 Hybrid	CanS	N					BSC264	DP-8b hybrid
DP-1 Hybrid	CanS	N					BSC100	DP-9 hybrid
DP-1 Hybrid	CanS	N					BSC267	DP-10 hybrid
DP-1 Hybrid	CanS	N					BSC266	DP-11 hybrid
DP-1 hybrid	F1 Hybrid	N					BSC228	DP-12 hybrid
DP-1 hybrid	F1 Hybrid	N					BSC200	DP-13 hybrid
DP-1 hybrid	F1 Hybrid	N					BSC68	DP-14 hybrid
DP-1 hybrid	F1 Hybrid	N					BSC69	DP-14a
DP-1 hybrid	F1 Hybrid	N					BSC71	DP-14b
DP-1 hybrid	F1 Hybrid	N					BSC129	DP-15 hybrid
DP-1 hybrid	F1 Hybrid	N					BSC276	DP-16 hybrid
DP-1 hybrid	F1 Hybrid	N
DP-1 hybrid	F1 Hybrid	N
DP-1 Hybrid	F1 hybrid	N	N	0.0666667
DP-1 Hybrid	F1 hybrid	N
DP-1 Hybrid	F1 hybrid	N
DP-1 Hybrid	F1 hybrid	N
DP-1 Hybrid	F1 hybrid	N	N	0.1
DP-1 Hybrid	F1 hybrid	Y	Y	0.388889
DP-1 Hybrid	F1 hybrid	N	N	0.0333333
DP-1 Hybrid	F1 Hybrid	N
DP-1 Hybrid	F1 Hybrid	N
DP-1 Hybrid	F1 Hybrid	N
DP-1 Hybrid	F1 Hybrid	N	N	0.0666667
DP-1 Hybrid	F1 Hybrid	N
DP-1 Hybrid	F1 Hybrid	N
DP-1 Hybrid	F1 Hybrid	N
DP-1 Hybrid	F1 Hybrid	N
DP-1 Hybrid	F1 Hybrid	N
DP-1 Hybrid	F1 Hybrid	N
DP-1 Hybrid	F1 Hybrid	Y	N	0.166667
DP-1 hybrid	SimC4	N
DP-1 hybrid	SimC4	N
DP-1 hybrid	SimC4	N
DP-1 hybrid	SimC4	N
DP-1 hybrid	SimC4	N
DP-1 hybrid	SimC4	N	N	0.0333333
DP-1 hybrid	SimC4	N
DP-1 hybrid	SimC4	N	N	0.0333333
DP-1 hybrid	SimC4	N	N	0.0333333
DP-1 hybrid	SimC4	N
DP-1 Hybrid	SimC4	N	N	0.1
DP-1 Hybrid	SimC4	Y	N	0.566667
DP-1 Hybrid	SimC4	N
DP-1 Hybrid	SimC4	Y	N	0.133333
DP-1 Hybrid	SimC4	Y	N	0.433333
DP-1 Hybrid	SimC4	Y	N	0.2
DP-1 Hybrid	SimC4	N
DP-1 Hybrid	SimC4	N
DP-1 Hybrid	SimC4	Y	N	0.2
DP-1 Hybrid	SimC4	N
DP-1 Hybrid	SimC4	N
DP-1 Hybrid	SimC4	Y	N	0.166667
DP-1 Hybrid	SimC4	Y	N	0.3
DP-1 Hybrid	SimC4	Y	N	0.133333
DP-1 Hybrid	SimC4	N	Y	0.08
DP-1 Hybrid	SimC4	N
DP-1 Hybrid	SimC4	Y	N	0.2
DP-10 Hybrid	CanS	N
DP-10 Hybrid	CanS	N
DP-10 Hybrid	CanS	N
DP-10 Hybrid	CanS	N
DP-10 Hybrid	CanS	N
DP-10 Hybrid	CanS	N
DP-10 Hybrid	CanS	N
DP-10 Hybrid	CanS	N
DP-10 Hybrid	CanS	N
DP-10 hybrid	F1 hybrid	N
DP-10 hybrid	F1 hybrid	N	N	0.0333333
DP-10 hybrid	F1 hybrid	N
DP-10 hybrid	F1 hybrid	N
DP-10 hybrid	F1 hybrid	N
DP-10 hybrid	F1 hybrid	N
DP-10 hybrid	F1 hybrid	N
DP-10 hybrid	F1 hybrid	Y	N	0.233333
DP-10 hybrid	F1 hybrid	N
DP-10 hybrid	F1 hybrid	Y	N	0.133333
DP-10 hybrid	F1 hybrid	Y	Y	0.16
DP-10 hybrid	F1 hybrid	N
DP-10 Hybrid	F1 Hybrid	N
DP-10 Hybrid	F1 Hybrid	N
DP-10 Hybrid	F1 Hybrid	Y	Y	0.136364
DP-10 Hybrid	F1 Hybrid	N
DP-10 Hybrid	F1 Hybrid	N
DP-10 Hybrid	F1 Hybrid	N
DP-10 Hybrid	F1 Hybrid	N
DP-10 Hybrid	F1 Hybrid	N
DP-10 Hybrid	F1 Hybrid	N
DP-10 Hybrid	F1 Hybrid	N
DP-10 Hybrid	F1 Hybrid	N
DP-10 Hybrid	F1 Hybrid	N
DP-10 Hybrid	F1 Hybrid	N
DP-10 Hybrid	F1 Hybrid	Y	N	0.2
DP-10 Hybrid	F1 Hybrid	Y	N	0.233333
DP-10 Hybrid	F1 Hybrid	N
DP-10 hybrid	SimC4	N	N	0.0666667
DP-10 hybrid	SimC4	N
DP-10 hybrid	SimC4	Y	N	0.166667
DP-10 hybrid	SimC4	Y	Y	0.4
DP-10 hybrid	SimC4	Y	Y	0.666667
DP-10 hybrid	SimC4	Y	N	0.133333
DP-10 hybrid	SimC4	Y	N	0.466667
DP-10 hybrid	SimC4	N
DP-10 hybrid	SimC4	Y	N	0.133333
DP-10 Hybrid	SimC4	N
DP-10 Hybrid	SimC4	Y	N	0.233333
DP-10 Hybrid	SimC4	N	N	0.0666667
DP-10 Hybrid	SimC4	N
DP-10 Hybrid	SimC4	N
DP-10 Hybrid	SimC4	Y	N	0.166667
DP-10 Hybrid	SimC4	N
DP-10 Hybrid	SimC4	Y	Y	0.578947
DP-10 Hybrid	SimC4	Y	N	0.4
DP-10 Hybrid	SimC4	N
DP-10 Hybrid	SimC4	N
DP-10 Hybrid	SimC4	Y	N	0.233333
DP-10 Hybrid	SimC4	N	N	0.0666667
DP-11 Hybrid	CanS	N
DP-11 Hybrid	CanS	N
DP-11 Hybrid	CanS	N
DP-11 Hybrid	CanS	N
DP-11 Hybrid	CanS	N
DP-11 Hybrid	CanS	N
DP-11 Hybrid	CanS	N
DP-11 hybrid	F1 hybrid	N
DP-11 hybrid	F1 hybrid	Y	N	0.333333
DP-11 hybrid	F1 hybrid	N
DP-11 hybrid	F1 hybrid	Y	N	0.133333
DP-11 hybrid	F1 hybrid	N
DP-11 hybrid	F1 hybrid	N	N	0.0333333
DP-11 Hybrid	F1 Hybrid	Y	N	0.566667
DP-11 Hybrid	F1 Hybrid	N
DP-11 Hybrid	F1 Hybrid	Y	N	0.166667
DP-11 Hybrid	F1 Hybrid	N
DP-11 Hybrid	F1 Hybrid	Y	N	0.366667
DP-11 Hybrid	F1 Hybrid	N	N	0.0666667
DP-11 Hybrid	F1 Hybrid	N	N	0.0333333
DP-11 Hybrid	F1 Hybrid	N
DP-11 Hybrid	F1 Hybrid	Y	N	0.166667
DP-11 Hybrid	F1 Hybrid	N
DP-11 Hybrid	F1 Hybrid	Y	Y	0.5
DP-11 Hybrid	F1 Hybrid	Y	Y	0.0434783
DP-11 Hybrid	F1 Hybrid	N	N	0.0666667
DP-11 Hybrid	F1 Hybrid	N	N	0.0333333
DP-11 Hybrid	F1 Hybrid	Y	N	0.733333
DP-11 Hybrid	F1 Hybrid	N	N	0.0666667
DP-11 Hybrid	F1 Hybrid	Y	N	0.233333
DP-11 Hybrid	F1 Hybrid	N
DP-11 Hybrid	F1 Hybrid	Y	N	0.166667
DP-11 Hybrid	F1 Hybrid	N	N	0.0666667
DP-11 Hybrid	F1 Hybrid	N	N	0.0666667
DP-11 Hybrid	F1 Hybrid	N
DP-11 Hybrid	F1 Hybrid	N	N	0.0666667
DP-11 Hybrid	F1 Hybrid	N	N	0.0333333
DP-11 Hybrid	F1 Hybrid	N	N	0.0333333
DP-11 Hybrid	F1 Hybrid	N
DP-11 Hybrid	F1 Hybrid	N
DP-11 Hybrid	F1 Hybrid	N	N	0.0333333
DP-11 Hybrid	F1 Hybrid	N
DP-11 hybrid	SimC4	N	N	0.0666667
DP-11 hybrid	SimC4	N
DP-11 hybrid	SimC4	N
DP-11 hybrid	SimC4	N
DP-11 hybrid	SimC4	Y	N	0.5
DP-11 hybrid	SimC4	N
DP-11 hybrid	SimC4	N
DP-11 hybrid	SimC4	N
DP-11 hybrid	SimC4	Y	N	0.333333
DP-11 hybrid	SimC4	N	N	0.1
DP-11 Hybrid	SimC4	Y	N	0.6
DP-11 Hybrid	SimC4	Y	N	0.233333
DP-11 Hybrid	SimC4	N	N	0.0333333
DP-11 Hybrid	SimC4	N
DP-11 Hybrid	SimC4	N
DP-11 Hybrid	SimC4	Y	N	0.433333
DP-11 Hybrid	SimC4	Y	N	0.866667
DP-11 Hybrid	SimC4	N
DP-11 Hybrid	SimC4	N
DP-11 Hybrid	SimC4	N	N	0.1
DP-11 Hybrid	SimC4	N
DP-11 Hybrid	SimC4	N	N	0.0666667
DP-11 Hybrid	SimC4	N	N	0.0333333
DP-11 Hybrid	SimC4	Y	N	0.433333
DP-11 Hybrid	SimC4	Y	N	0.366667
DP-11 Hybrid	SimC4	Y	Y	0.285714
DP-11 Hybrid	SimC4	Y	N	0.4
DP-11 Hybrid	SimC4	Y	N	0.7
DP-11 Hybrid	SimC4	Y	N	0.933333
DP-11 Hybrid	SimC4	N	N	0.0333333
DP-11 Hybrid	SimC4	Y	N	0.2
DP-11 Hybrid	SimC4	N	N	0.0666667
DP-11 Hybrid	SimC4	Y	N	0.7
DP-11 Hybrid	SimC4	Y	N	0.6
DP-12 Hybrid	CanS	N
DP-12 Hybrid	CanS	N
DP-12 Hybrid	CanS	N
DP-12 Hybrid	CanS	N
DP-12 Hybrid	CanS	N
DP-12 Hybrid	CanS	N
DP-12 Hybrid	CanS	N
DP-12 Hybrid	CanS	N
DP-12 Hybrid	CanS	N
DP-12 Hybrid	CanS	N
DP-12 Hybrid	CanS	N
DP-12 Hybrid	CanS	N
DP-12 Hybrid	CanS	N
DP-12 hybrid	F1 hybrid	N	N	0.0333333
DP-12 hybrid	F1 hybrid	N
DP-12 hybrid	F1 hybrid	N	N	0.0666667
DP-12 hybrid	F1 hybrid	Y	N	0.2
DP-12 hybrid	F1 hybrid	Y	N	0.166667
DP-12 hybrid	F1 hybrid	N
DP-12 hybrid	F1 hybrid	N
DP-12 hybrid	F1 hybrid	N
DP-12 hybrid	F1 hybrid	N
DP-12 hybrid	F1 hybrid	N
DP-12 hybrid	F1 Hybrid	N
DP-12 hybrid	F1 Hybrid	N
DP-12 hybrid	F1 Hybrid	N
DP-12 hybrid	F1 Hybrid	N	N	0.1
DP-12 hybrid	F1 Hybrid	N
DP-12 hybrid	F1 Hybrid	Y	N	0.433333
DP-12 hybrid	F1 Hybrid	Y	N	0.166667
DP-12 hybrid	F1 Hybrid	N	N	0.0333333
DP-12 hybrid	F1 Hybrid	N	N	0.0333333
DP-12 hybrid	F1 Hybrid	N	N	0.0666667
DP-12 Hybrid	F1 hybrid	N
DP-12 Hybrid	F1 hybrid	Y	N	0.433333
DP-12 Hybrid	F1 hybrid	N
DP-12 Hybrid	F1 hybrid	N
DP-12 Hybrid	F1 hybrid	N
DP-12 Hybrid	F1 hybrid	Y	N	0.133333
DP-12 Hybrid	F1 Hybrid	Y	N	0.433333
DP-12 Hybrid	F1 Hybrid	N	N	0.1
DP-12 Hybrid	F1 Hybrid	N
DP-12 Hybrid	F1 Hybrid	Y	N	0.166667
DP-12 Hybrid	F1 Hybrid	N	N	0.0333333
DP-12 Hybrid	F1 Hybrid	N
DP-12 Hybrid	F1 Hybrid	N
DP-12 Hybrid	F1 Hybrid	Y	N	0.2
DP-12 Hybrid	F1 Hybrid	N
DP-12 Hybrid	F1 Hybrid	N
DP-12 Hybrid	F1 Hybrid	N
DP-12 Hybrid	F1 Hybrid	Y	N	0.0666667
DP-12 hybrid	SimC4	N	N	0.0666667
DP-12 hybrid	SimC4	N	N	0.0333333
DP-12 hybrid	SimC4	N
DP-12 hybrid	SimC4	N
DP-12 hybrid	SimC4	N
DP-12 hybrid	SimC4	N
DP-12 hybrid	SimC4	Y	N	0.133333
DP-12 hybrid	SimC4	N
DP-12 hybrid	SimC4	Y	N	0.133333
DP-12 hybrid	SimC4	N
DP-12 Hybrid	SimC4	Y	N	0.133333
DP-12 Hybrid	SimC4	N	N	0.0333333
DP-12 Hybrid	SimC4	N
DP-12 Hybrid	SimC4	N
DP-12 Hybrid	SimC4	Y	N	0.166667
DP-12 Hybrid	SimC4	N
DP-12 Hybrid	SimC4	N	N	0.0333333
DP-12 Hybrid	SimC4	Y	N	0.633333
DP-12 Hybrid	SimC4	Y	N	0.6
DP-12 Hybrid	SimC4	N	N	0.0333333
DP-12 Hybrid	SimC4	N
DP-12 Hybrid	SimC4	N
DP-12 Hybrid	SimC4	Y	N	0.266667
DP-12 Hybrid	SimC4	N
DP-12 Hybrid	SimC4	Y	N	0.133333
DP-12 Hybrid	SimC4	N
DP-13 Hybrid	CanS	N
DP-13 Hybrid	CanS	N
DP-13 Hybrid	CanS	N
DP-13 Hybrid	CanS	N
DP-13 Hybrid	CanS	N
DP-13 Hybrid	CanS	N
DP-13 Hybrid	CanS	N
DP-13 Hybrid	CanS	N
DP-13 Hybrid	CanS	N
DP-13 Hybrid	CanS	N
DP-13 Hybrid	CanS	N
DP-13 Hybrid	CanS	N
DP-13 Hybrid	CanS	N
DP-13 Hybrid	CanS	N
DP-13 hybrid	F1 hybrid	N
DP-13 hybrid	F1 hybrid	N
DP-13 hybrid	F1 hybrid	N
DP-13 hybrid	F1 hybrid	N
DP-13 hybrid	F1 hybrid	N
DP-13 hybrid	F1 hybrid	N	N	0.0666667
DP-13 hybrid	F1 hybrid	Y	N	0.133333
DP-13 hybrid	F1 hybrid	N
DP-13 hybrid	F1 hybrid	N
DP-13 hybrid	F1 hybrid	N
DP-13 hybrid	F1 Hybrid	N
DP-13 hybrid	F1 Hybrid	N	N	0.0333333
DP-13 hybrid	F1 Hybrid	N
DP-13 hybrid	F1 Hybrid	N
DP-13 hybrid	F1 Hybrid	N
DP-13 hybrid	F1 Hybrid	N
DP-13 hybrid	F1 Hybrid	N
DP-13 hybrid	F1 Hybrid	N
DP-13 hybrid	F1 Hybrid	N
DP-13 hybrid	F1 Hybrid	N
DP-13 Hybrid	F1 hybrid	N
DP-13 Hybrid	F1 hybrid	N
DP-13 Hybrid	F1 hybrid	N
DP-13 Hybrid	F1 hybrid	N	N	0.0333333
DP-13 Hybrid	F1 hybrid	N	N	0.0333333
DP-13 Hybrid	F1 hybrid	Y	N	0.333333
DP-13 Hybrid	F1 hybrid	N
DP-13 hybrid	SimC4	N
DP-13 hybrid	SimC4	N
DP-13 hybrid	SimC4	Y	N	0.433333
DP-13 hybrid	SimC4	N
DP-13 hybrid	SimC4	N
DP-13 hybrid	SimC4	N
DP-13 hybrid	SimC4	N	N	0.0333333
DP-13 hybrid	SimC4	Y	N	0.3
DP-13 hybrid	SimC4	N
DP-13 hybrid	SimC4	N
DP-13 Hybrid	SimC4	N
DP-13 Hybrid	SimC4	N	N	0.0333333
DP-13 Hybrid	SimC4	Y	N	0.233333
DP-13 Hybrid	SimC4	N
DP-13 Hybrid	SimC4	N	N	0.0333333
DP-13 Hybrid	SimC4	N
DP-13 Hybrid	SimC4	N	N	0.0666667
DP-13 Hybrid	SimC4	N	N	0.1
DP-13 Hybrid	SimC4	N	N	0.1
DP-13 Hybrid	SimC4	Y	N	0.4
DP-13 Hybrid	SimC4	Y	N	0.7
DP-13 Hybrid	SimC4	N
DP-13 Hybrid	SimC4	Y	Y	0.206897
DP-13 Hybrid	SimC4	N	N	0.0333333
DP-14 Hybrid	CanS	N
DP-14 Hybrid	CanS	N
DP-14 Hybrid	CanS	N
DP-14 Hybrid	CanS	N
DP-14 Hybrid	CanS	N
DP-14 Hybrid	CanS	N
DP-14 Hybrid	CanS	N
DP-14 Hybrid	CanS	N
DP-14 Hybrid	CanS	N
DP-14 Hybrid	CanS	N
DP-14 Hybrid	CanS	N
DP-14 Hybrid	CanS	N
DP-14 Hybrid	CanS	N
DP-14 Hybrid	CanS	N
DP-14 Hybrid	CanS	N
DP-14 Hybrid	CanS	N
DP-14 Hybrid	CanS	N
DP-14 Hybrid	CanS	N
DP-14 Hybrid	CanS	N
DP-14 Hybrid	CanS	N
DP-14 hybrid	F1 Hybrid	Y	N	0.3
DP-14 hybrid	F1 Hybrid	Y	N	0.366667
DP-14 hybrid	F1 Hybrid	N
DP-14 hybrid	F1 Hybrid	N
DP-14 hybrid	F1 Hybrid	N
DP-14 hybrid	F1 Hybrid	N	N	0.1
DP-14 hybrid	F1 Hybrid	N
DP-14 hybrid	F1 Hybrid	N	N	0.0333333
DP-14 hybrid	F1 Hybrid	Y	N	0.166667
DP-14 hybrid	F1 Hybrid	Y	N	0.366667
DP-14 Hybrid	F1 hybrid	N	N	0.0333333
DP-14 Hybrid	F1 hybrid	N
DP-14 Hybrid	F1 hybrid	N	N	0.1
DP-14 Hybrid	F1 hybrid	N
DP-14 Hybrid	F1 hybrid	N
DP-14 Hybrid	F1 hybrid	Y	N	0.4
DP-14 Hybrid	F1 hybrid	N
DP-14 Hybrid	F1 Hybrid	N
DP-14 Hybrid	F1 Hybrid	Y	N	0.2
DP-14 Hybrid	F1 Hybrid	N
DP-14 Hybrid	F1 Hybrid	N
DP-14 Hybrid	F1 Hybrid	N
DP-14 Hybrid	F1 Hybrid	N
DP-14 Hybrid	F1 Hybrid	N
DP-14 Hybrid	F1 Hybrid	N
DP-14 Hybrid	F1 Hybrid	N
DP-14 Hybrid	F1 Hybrid	N
DP-14 Hybrid	F1 Hybrid	N	N	0.0666667
DP-14 Hybrid	F1 Hybrid	N
DP-14 hybrid	SimC4	N
DP-14 hybrid	SimC4	N
DP-14 hybrid	SimC4	N
DP-14 hybrid	SimC4	Y	N	0.3
DP-14 hybrid	SimC4	N
DP-14 hybrid	SimC4	N
DP-14 hybrid	SimC4	N
DP-14 hybrid	SimC4	N
DP-14 hybrid	SimC4	N
DP-14 hybrid	SimC4	N
DP-14 Hybrid	SimC4	Y	N	0.166667
DP-14 Hybrid	SimC4	N
DP-14 Hybrid	SimC4	Y	Y	0.6
DP-14 Hybrid	SimC4	N
DP-14 Hybrid	SimC4	N
DP-14 Hybrid	SimC4	N	N	0.0333333
DP-14 Hybrid	SimC4	Y	N	0.666667
DP-14 Hybrid	SimC4	N
DP-14 Hybrid	SimC4	N	N	0.0333333
DP-14 Hybrid	SimC4	Y	N	0.4
DP-14 Hybrid	SimC4	Y	N	0.633333
DP-14 Hybrid	SimC4	N
DP-14 Hybrid	SimC4	N
DP-14 Hybrid	SimC4	N
DP-14 Hybrid	SimC4	N	N	0.1
DP-14 Hybrid	SimC4	N
DP-14a	F1 Hybrid	N	N	0.0666667
DP-14a	F1 Hybrid	Y	Y	0.08
DP-14a	F1 Hybrid	Y	Y	0.107143
DP-14a	F1 Hybrid	N
DP-14a	F1 Hybrid	N
DP-14a	F1 Hybrid	N
DP-14a	F1 Hybrid	N
DP-14a	F1 Hybrid	N
DP-14a	F1 Hybrid	N
DP-14a	F1 Hybrid	N
DP-14a	F1 Hybrid	N
DP-14a	F1 Hybrid	N
DP-14a	F1 Hybrid	N
DP-14a	SimC4	N	N	0.0333333
DP-14a	SimC4	N	N	0.05
DP-14a	SimC4	N	N	0.0666667
DP-14a	SimC4	Y	N	0.133333
DP-14a	SimC4	Y	N	0.166667
DP-14a	SimC4	Y	N	0.333333
DP-14a	SimC4	Y	Y	0.533333
DP-14a	SimC4	Y	Y	0.894737
DP-14a	SimC4	N
DP-14a	SimC4	N
DP-14a	SimC4	N
DP-14a	SimC4	N
DP-14a Hybrid	F1 Hybrid	N	N	0.0333333
DP-14a Hybrid	F1 Hybrid	N	N	0.0666667
DP-14a Hybrid	F1 Hybrid	N	N	0.1
DP-14a Hybrid	F1 Hybrid	Y	Y	0.0416667
DP-14a Hybrid	F1 Hybrid	Y	Y	0.318182
DP-14a Hybrid	F1 Hybrid	Y	Y	0.36
DP-14a Hybrid	F1 Hybrid	N
DP-14a Hybrid	F1 Hybrid	N
DP-14a Hybrid	F1 Hybrid	N
DP-14a Hybrid	F1 Hybrid	N
DP-14a Hybrid	F1 Hybrid	N
DP-14a Hybrid	F1 Hybrid	N
DP-14a Hybrid	F1 Hybrid	N
DP-14a Hybrid	F1 Hybrid	N
DP-14a Hybrid	F1 Hybrid	N
DP-14a Hybrid	F1 Hybrid	N
DP-14a Hybrid	F1 Hybrid	N
DP-14a Hybrid	F1 Hybrid	Y	N	0.2
DP-14a Hybrid	F1 Hybrid	N
DP-14a Hybrid	F1 Hybrid	N
DP-14a Hybrid	F1 Hybrid	N
DP-14a Hybrid	F1 Hybrid	N
DP-14a Hybrid	F1 Hybrid	N
DP-14a Hybrid	SimC4	N	N	0.0333333
DP-14a Hybrid	SimC4	Y	N	0.166667
DP-14a Hybrid	SimC4	Y	N	0.2
DP-14a Hybrid	SimC4	Y	N	0.2
DP-14a Hybrid	SimC4	Y	N	0.233333
DP-14a Hybrid	SimC4	Y	N	0.266667
DP-14a Hybrid	SimC4	Y	N	0.333333
DP-14a Hybrid	SimC4	Y	N	0.433333
DP-14a Hybrid	SimC4	Y	N	0.633333
DP-14a Hybrid	SimC4	Y	N
DP-14a Hybrid	SimC4	Y	Y	0.166667
DP-14a Hybrid	SimC4	Y	Y	0.375
DP-14a Hybrid	SimC4	N
DP-14a Hybrid	SimC4	N
DP-14a Hybrid	SimC4	N
DP-14a Hybrid	SimC4	N
DP-14a Hybrid	SimC4	N
DP-14a Hybrid	SimC4	N
DP-14a Hybrid	SimC4	N
DP-14a Hybrid	SimC4	N
DP-14a Hybrid	SimC4	N
DP-14a Hybrid	SimC4	N	N	0.0666667
DP-14a Hybrid	SimC4	Y	N	0.166667
DP-14a Hybrid	SimC4	Y	N	0.2
DP-14a Hybrid	SimC4	Y	Y	0.25
DP-14a Hybrid	SimC4	N
DP-14a Hybrid	SimC4	N
DP-14b Hybrid	F1 Hybrid	N	N	0.0333333
DP-14b Hybrid	F1 Hybrid	N	N	0.0666667
DP-14b Hybrid	F1 Hybrid	Y	Y	0.08
DP-14b Hybrid	F1 Hybrid	Y	Y	0.2
DP-14b Hybrid	F1 Hybrid	Y	N	0.466667
DP-14b Hybrid	F1 Hybrid	N
DP-14b Hybrid	F1 Hybrid	N
DP-14b Hybrid	F1 Hybrid	N
DP-14b Hybrid	F1 Hybrid	N
DP-14b Hybrid	F1 Hybrid	N
DP-14b Hybrid	F1 Hybrid	N
DP-14b Hybrid	F1 Hybrid	N
DP-14b Hybrid	F1 Hybrid	N
DP-14b Hybrid	F1 Hybrid	Y	N
DP-14b Hybrid	F1 Hybrid	N
DP-14b Hybrid	F1 Hybrid	N
DP-14b Hybrid	F1 Hybrid	N
DP-14b Hybrid	F1 Hybrid	N
DP-14b Hybrid	F1 Hybrid	N
DP-14b Hybrid	F1 Hybrid	N
DP-14b Hybrid	F1 Hybrid	N
DP-14b Hybrid	F1 Hybrid	N
DP-14b Hybrid	F1 Hybrid	N
DP-14b Hybrid	F1 Hybrid	N
DP-14b Hybrid	SimC4	N	N	0.0333333
DP-14b Hybrid	SimC4	N	N	0.0333333
DP-14b Hybrid	SimC4	N	N	0.0333333
DP-14b Hybrid	SimC4	N	N	0.0333333
DP-14b Hybrid	SimC4	N	N	0.0666667
DP-14b Hybrid	SimC4	Y	Y	0.0666667
DP-14b Hybrid	SimC4	Y	Y	0.111111
DP-14b Hybrid	SimC4	Y	N	0.166667
DP-14b Hybrid	SimC4	Y	N	0.2
DP-14b Hybrid	SimC4	Y	N	0.266667
DP-14b Hybrid	SimC4	Y	N	0.3
DP-14b Hybrid	SimC4	Y	Y	0.310345
DP-14b Hybrid	SimC4	Y	N	0.366667
DP-14b Hybrid	SimC4	Y	Y	0.416667
DP-14b Hybrid	SimC4	Y	N	0.5
DP-14b Hybrid	SimC4	Y	N	0.7
DP-14b Hybrid	SimC4	Y	N
DP-14b Hybrid	SimC4	Y	N
DP-14b Hybrid	SimC4	Y	N
DP-14b Hybrid	SimC4	Y	N
DP-14b Hybrid	SimC4	N
DP-14b Hybrid	SimC4	N
DP-14b Hybrid	SimC4	N
DP-14b Hybrid	SimC4	N
DP-15 Hybrid	CanS	N
DP-15 Hybrid	CanS	N
DP-15 Hybrid	CanS	N
DP-15 Hybrid	CanS	N
DP-15 Hybrid	CanS	N
DP-15 Hybrid	CanS	N
DP-15 Hybrid	CanS	N
DP-15 Hybrid	CanS	N
DP-15 hybrid	F1 hybrid	N
DP-15 hybrid	F1 hybrid	N	N	0.0333333
DP-15 hybrid	F1 hybrid	N
DP-15 hybrid	F1 hybrid	N
DP-15 hybrid	F1 hybrid	N	N	0.0666667
DP-15 hybrid	F1 hybrid	N	N	0.0333333
DP-15 hybrid	F1 hybrid	N
DP-15 Hybrid	F1 Hybrid	Y	N	0.3
DP-15 Hybrid	F1 Hybrid	N
DP-15 Hybrid	F1 Hybrid	N	N	0.1
DP-15 Hybrid	F1 Hybrid	N	N	0.0333333
DP-15 Hybrid	F1 Hybrid	N	N	0.0333333
DP-15 Hybrid	F1 Hybrid	N	N	0.0666667
DP-15 Hybrid	F1 Hybrid	N
DP-15 Hybrid	F1 Hybrid	N
DP-15 Hybrid	F1 Hybrid	N
DP-15 Hybrid	F1 Hybrid	N	N	0.1
DP-15 Hybrid	F1 Hybrid	N
DP-15 Hybrid	F1 Hybrid	N	N	0.0333333
DP-15 Hybrid	F1 Hybrid	Y	N	0.266667
DP-15 Hybrid	F1 Hybrid	N
DP-15 Hybrid	F1 Hybrid	N	N	0.1
DP-15 Hybrid	F1 Hybrid	N
DP-15 hybrid	SimC4	N
DP-15 hybrid	SimC4	N
DP-15 hybrid	SimC4	Y	N	0.3
DP-15 hybrid	SimC4	N	N	0.0333333
DP-15 hybrid	SimC4	N
DP-15 hybrid	SimC4	Y	N	0.533333
DP-15 hybrid	SimC4	N
DP-15 Hybrid	SimC4	N
DP-15 Hybrid	SimC4	Y	N	0.466667
DP-15 Hybrid	SimC4	N
DP-15 Hybrid	SimC4	Y	N	0.133333
DP-15 Hybrid	SimC4	N	N	0.0333333
DP-15 Hybrid	SimC4	N	N	0.1
DP-15 Hybrid	SimC4	Y	N	0.3
DP-15 Hybrid	SimC4	Y	N	0.166667
DP-15 Hybrid	SimC4	N
DP-15 Hybrid	SimC4	Y	Y	0.666667
DP-15 Hybrid	SimC4	N
DP-15 Hybrid	SimC4	Y	N	0.6
DP-15 Hybrid	SimC4	N
DP-15 Hybrid	SimC4	N
DP-15 Hybrid	SimC4	N
DP-15 Hybrid	SimC4	N
DP-15 Hybrid	SimC4	Y	N	0.633333
DP-16 Hybrid	CanS	N
DP-16 Hybrid	CanS	N
DP-16 Hybrid	CanS	N
DP-16 Hybrid	CanS	N
DP-16 Hybrid	CanS	N
DP-16 Hybrid	CanS	N
DP-16 hybrid	F1 hybrid	N	N	0.0333333
DP-16 hybrid	F1 hybrid	N
DP-16 hybrid	F1 hybrid	Y	N	0.166667
DP-16 hybrid	F1 hybrid	N
DP-16 hybrid	F1 hybrid	Y	N	0.166667
DP-16 hybrid	F1 hybrid	Y	N	0.2
DP-16 hybrid	F1 hybrid	N
DP-16 hybrid	F1 hybrid	Y	N	0.633333
DP-16 Hybrid	F1 Hybrid	Y	N	0.166667
DP-16 Hybrid	F1 Hybrid	Y	Y	0.0740741
DP-16 Hybrid	F1 Hybrid	N		0.0666667
DP-16 Hybrid	F1 Hybrid	N
DP-16 Hybrid	F1 Hybrid	N	N	0.0333333
DP-16 Hybrid	F1 Hybrid	N
DP-16 Hybrid	F1 Hybrid	N
DP-16 Hybrid	F1 Hybrid	N
DP-16 Hybrid	F1 Hybrid	Y	N	0.333333
DP-16 Hybrid	F1 Hybrid	Y	N	0.466667
DP-16 Hybrid	F1 Hybrid	Y	N	0.2
DP-16 Hybrid	F1 Hybrid	N
DP-16 Hybrid	F1 Hybrid	N	N	0.1
DP-16 Hybrid	F1 Hybrid	Y	N	0.3
DP-16 Hybrid	F1 Hybrid	N	N	0.0333333
DP-16 Hybrid	F1 Hybrid	N
DP-16 hybrid	SimC4	N	N	0.0666667
DP-16 hybrid	SimC4	Y	N	0.2
DP-16 hybrid	SimC4	N
DP-16 hybrid	SimC4	N	N	0.0333333
DP-16 hybrid	SimC4	Y	N	0.4
DP-16 hybrid	SimC4	Y	N	0.233333
DP-16 hybrid	SimC4	N
DP-16 hybrid	SimC4	N
DP-16 hybrid	SimC4	Y	N	0.166667
DP-16 hybrid	SimC4	Y	N	0.5
DP-16 Hybrid	SimC4	N
DP-16 Hybrid	SimC4	Y	N	0.7
DP-16 Hybrid	SimC4	Y	N	0.166667
DP-16 Hybrid	SimC4	Y	N	0.166667
DP-16 Hybrid	SimC4	Y	N	0.333333
DP-16 Hybrid	SimC4	Y	N	0.133333
DP-16 Hybrid	SimC4	N
DP-16 Hybrid	SimC4	Y	N	0.2
DP-16 Hybrid	SimC4	Y	Y	0.380952
DP-16 Hybrid	SimC4	Y		0.166667
DP-2 Hybrid	CanS	N
DP-2 Hybrid	CanS	N
DP-2 Hybrid	CanS	N
DP-2 Hybrid	CanS	N
DP-2 Hybrid	CanS	N
DP-2 Hybrid	CanS	N
DP-2 Hybrid	CanS	N
DP-2 Hybrid	CanS	N
DP-2 Hybrid	CanS	N
DP-2 Hybrid	CanS	N
DP-2 Hybrid	CanS	N
DP-2 Hybrid	CanS	N
DP-2 Hybrid	CanS	N
DP-2 Hybrid	CanS	N
DP-2 hybrid	F1 hybrid	N
DP-2 hybrid	F1 hybrid	N
DP-2 hybrid	F1 hybrid	N	N	0.0666667
DP-2 hybrid	F1 hybrid	N	N	0.0333333
DP-2 hybrid	F1 hybrid	N
DP-2 hybrid	F1 hybrid	Y	N	0.4
DP-2 hybrid	F1 hybrid	Y	N	0.133333
DP-2 hybrid	F1 hybrid	N	N	0.1
DP-2 hybrid	F1 hybrid	N
DP-2 hybrid	F1 hybrid	N
DP-2 hybrid	F1 Hybrid	N
DP-2 hybrid	F1 Hybrid	N
DP-2 hybrid	F1 Hybrid	N	N	0.0333333
DP-2 hybrid	F1 Hybrid	N
DP-2 hybrid	F1 Hybrid	N	N	0.0333333
DP-2 hybrid	F1 Hybrid	N	N	0.0333333
DP-2 hybrid	F1 Hybrid	N
DP-2 hybrid	F1 Hybrid	N
DP-2 hybrid	F1 Hybrid	N
DP-2 hybrid	F1 Hybrid	N
DP-2 Hybrid	F1 hybrid	N
DP-2 Hybrid	F1 hybrid	Y	N	0.133333
DP-2 Hybrid	F1 hybrid	N
DP-2 Hybrid	F1 hybrid	N
DP-2 Hybrid	F1 hybrid	N
DP-2 Hybrid	F1 hybrid	N
DP-2 Hybrid	F1 hybrid	N
DP-2 Hybrid	F1 Hybrid	N
DP-2 Hybrid	F1 Hybrid	N
DP-2 Hybrid	F1 Hybrid	N
DP-2 Hybrid	F1 Hybrid	N
DP-2 Hybrid	F1 Hybrid	N
DP-2 Hybrid	F1 Hybrid	N
DP-2 Hybrid	F1 Hybrid	N
DP-2 Hybrid	F1 Hybrid	N
DP-2 Hybrid	F1 Hybrid	N
DP-2 Hybrid	F1 Hybrid	N
DP-2 Hybrid	F1 Hybrid	N
DP-2 hybrid	SimC4	N
DP-2 hybrid	SimC4	Y	N	0.333333
DP-2 hybrid	SimC4	N	N	0.0333333
DP-2 hybrid	SimC4	N
DP-2 hybrid	SimC4	Y	N	0.366667
DP-2 hybrid	SimC4	N
DP-2 hybrid	SimC4	N
DP-2 hybrid	SimC4	N
DP-2 hybrid	SimC4	N	N	0.0666667
DP-2 hybrid	SimC4	N	N	0.0333333
DP-2 Hybrid	SimC4	N	N	0.1
DP-2 Hybrid	SimC4	N
DP-2 Hybrid	SimC4	Y	N	0.166667
DP-2 Hybrid	SimC4	Y	N	0.233333
DP-2 Hybrid	SimC4	N	N	0.0333333
DP-2 Hybrid	SimC4	N
DP-2 Hybrid	SimC4	Y	N	0.166667
DP-2 Hybrid	SimC4	N	N	0.1
DP-2 Hybrid	SimC4	Y	N	0.133333
DP-2 Hybrid	SimC4	N
DP-2 Hybrid	SimC4	N
DP-2 Hybrid	SimC4	N
DP-2 Hybrid	SimC4	N	N	0.0333333
DP-2 Hybrid	SimC4	N
DP-2 Hybrid	SimC4	Y	N	0.333333
DP-2 Hybrid	SimC4	N
DP-3 Hybrid	CanS	N
DP-3 Hybrid	CanS	N
DP-3 Hybrid	CanS	N
DP-3 Hybrid	CanS	N
DP-3 Hybrid	CanS	N
DP-3 Hybrid	CanS	N
DP-3 Hybrid	CanS	N	N	0.0333333
DP-3 Hybrid	CanS	N
DP-3 Hybrid	CanS	N
DP-3 Hybrid	CanS	N
DP-3 hybrid	F1 hybrid	N	N	0.0333333
DP-3 hybrid	F1 hybrid	N
DP-3 hybrid	F1 hybrid	N
DP-3 hybrid	F1 hybrid	N
DP-3 hybrid	F1 hybrid	N
DP-3 hybrid	F1 hybrid	N
DP-3 hybrid	F1 hybrid	N
DP-3 hybrid	F1 hybrid	N
DP-3 hybrid	F1 hybrid	N
DP-3 hybrid	F1 hybrid	N
DP-3 hybrid	F1 hybrid	N	N	0.0333333
DP-3 hybrid	F1 hybrid	N
DP-3 hybrid	F1 hybrid	N
DP-3 hybrid	F1 hybrid	N
DP-3 hybrid	F1 hybrid	N
DP-3 hybrid	F1 hybrid	N
DP-3 Hybrid	F1 Hybrid	Y	N	0.8
DP-3 Hybrid	F1 Hybrid	N
DP-3 Hybrid	F1 Hybrid	N
DP-3 Hybrid	F1 Hybrid	N
DP-3 Hybrid	F1 Hybrid	Y	N	0.133333
DP-3 Hybrid	F1 Hybrid	N	N	0.1
DP-3 Hybrid	F1 Hybrid	N
DP-3 Hybrid	F1 Hybrid	N	N	0.0666667
DP-3 Hybrid	F1 Hybrid	N
DP-3 Hybrid	F1 Hybrid	N	N	0.0666667
DP-3 Hybrid	F1 Hybrid	N	N	0.0333333
DP-3 Hybrid	F1 Hybrid	N
DP-3 Hybrid	F1 Hybrid	N	N	0.0666667
DP-3 Hybrid	F1 Hybrid	N
DP-3 Hybrid	F1 Hybrid	N
DP-3 Hybrid	F1 Hybrid	Y	Y	0.037037
DP-3 hybrid	SimC4	N
DP-3 hybrid	SimC4	N	N	0.0666667
DP-3 hybrid	SimC4	N
DP-3 hybrid	SimC4	N
DP-3 hybrid	SimC4	N
DP-3 hybrid	SimC4	N
DP-3 hybrid	SimC4	N
DP-3 hybrid	SimC4	N	N	0.0666667
DP-3 hybrid	SimC4	N
DP-3 hybrid	SimC4	N
DP-3 hybrid	SimC4	N
DP-3 hybrid	SimC4	N	N	0.0333333
DP-3 hybrid	SimC4	N
DP-3 hybrid	SimC4	N
DP-3 hybrid	SimC4	N
DP-3 hybrid	SimC4	N
DP-3 Hybrid	SimC4	N
DP-3 Hybrid	SimC4	Y	N	0.133333
DP-3 Hybrid	SimC4	N	N	0.1
DP-3 Hybrid	SimC4	N
DP-3 Hybrid	SimC4	N
DP-3 Hybrid	SimC4	N
DP-3 Hybrid	SimC4	N
DP-3 Hybrid	SimC4	N
DP-3 Hybrid	SimC4	N
DP-3 Hybrid	SimC4	Y	N	0.3
DP-3 Hybrid	SimC4	N
DP-3 Hybrid	SimC4	Y	Y	0.0526316
DP-4 Hybrid	CanS	N
DP-4 Hybrid	CanS	N
DP-4 Hybrid	CanS	N
DP-4 Hybrid	CanS	N
DP-4 Hybrid	CanS	N
DP-4 Hybrid	CanS	N
DP-4 Hybrid	CanS	N
DP-4 Hybrid	CanS	N
DP-4 Hybrid	CanS	N
DP-4 Hybrid	CanS	N
DP-4 Hybrid	CanS	N
DP-4 Hybrid	CanS	N
DP-4 Hybrid	CanS	N
DP-4 Hybrid	CanS	N
DP-4 hybrid	F1 Hybrid	N
DP-4 hybrid	F1 Hybrid	N
DP-4 hybrid	F1 Hybrid	N
DP-4 hybrid	F1 Hybrid	N	Y	0.1
DP-4 hybrid	F1 Hybrid	N	N	0.1
DP-4 hybrid	F1 Hybrid	Y	N	0.166667
DP-4 hybrid	F1 Hybrid	N
DP-4 hybrid	F1 Hybrid	N	N	0.0333333
DP-4 hybrid	F1 Hybrid	N
DP-4 Hybrid	F1 hybrid	N	N	0.0666667
DP-4 Hybrid	F1 hybrid	N	N	0.0333333
DP-4 Hybrid	F1 hybrid	N
DP-4 Hybrid	F1 hybrid	N
DP-4 Hybrid	F1 hybrid	N
DP-4 Hybrid	F1 hybrid	N
DP-4 Hybrid	F1 hybrid	N
DP-4 Hybrid	F1 hybrid	N	N	0.0333333
DP-4 Hybrid	F1 Hybrid	N
DP-4 Hybrid	F1 Hybrid	N
DP-4 Hybrid	F1 Hybrid	N
DP-4 Hybrid	F1 Hybrid	Y	N	0.133333
DP-4 Hybrid	F1 Hybrid	N
DP-4 Hybrid	F1 Hybrid	N
DP-4 Hybrid	F1 Hybrid	N	N	0.0333333
DP-4 Hybrid	F1 Hybrid	N
DP-4 Hybrid	F1 Hybrid	N	N	0.0333333
DP-4 Hybrid	F1 Hybrid	N
DP-4 Hybrid	F1 Hybrid	N
DP-4 hybrid	SimC4	N	N	0.0333333
DP-4 hybrid	SimC4	N
DP-4 hybrid	SimC4	N	N	0.0333333
DP-4 hybrid	SimC4	N
DP-4 hybrid	SimC4	N
DP-4 hybrid	SimC4	N
DP-4 hybrid	SimC4	Y	N	0.133333
DP-4 hybrid	SimC4	N
DP-4 hybrid	SimC4	Y	N	0.266667
DP-4 hybrid	SimC4	N
DP-4 Hybrid	SimC4	N	N	0.0666667
DP-4 Hybrid	SimC4	N
DP-4 Hybrid	SimC4	Y	N	0.266667
DP-4 Hybrid	SimC4	N
DP-4 Hybrid	SimC4	N	N	0.1
DP-4 Hybrid	SimC4	N	N	0.0333333
DP-4 Hybrid	SimC4	Y	N	0.166667
DP-4 Hybrid	SimC4	N
DP-4 Hybrid	SimC4	N
DP-4 Hybrid	SimC4	N
DP-4 Hybrid	SimC4	Y	N	0.133333
DP-4 Hybrid	SimC4	N
DP-4 Hybrid	SimC4	Y	Y	0.16
DP-4 Hybrid	SimC4	N
DP-4 Hybrid	SimC4	Y	N	0.2
DP-4 Hybrid	SimC4	N
DP-4 Hybrid	SimC4	Y	N	0.2
DP-4 Hybrid	SimC4	Y	N	0.233333
DP-6 Hybrid	CanS	N
DP-6 Hybrid	CanS	N
DP-6 Hybrid	CanS	N
DP-6 Hybrid	CanS	N
DP-6 Hybrid	CanS	N
DP-6 Hybrid	CanS	N
DP-6 Hybrid	CanS	N
DP-6 Hybrid	CanS	N
DP-6 Hybrid	CanS	N
DP-6 Hybrid	CanS	N
DP-6 Hybrid	CanS	N
DP-6 Hybrid	CanS	N
DP-6 Hybrid	CanS	N
DP-6 Hybrid	CanS	N
DP-6 Hybrid	CanS	N
DP-6 Hybrid	CanS	N
DP-6 Hybrid	F1 Hybrid	N
DP-6 Hybrid	F1 Hybrid	N
DP-6 Hybrid	F1 Hybrid	N
DP-6 Hybrid	F1 Hybrid	Y	N	0.266667
DP-6 Hybrid	F1 Hybrid	N	N	0.0333333
DP-6 Hybrid	F1 Hybrid	N
DP-6 Hybrid	F1 Hybrid	N	N	0.0333333
DP-6 Hybrid	F1 Hybrid	N	N	0.0333333
DP-6 Hybrid	F1 Hybrid	N
DP-6 Hybrid	F1 Hybrid	N
DP-6 Hybrid	F1 Hybrid	N
DP-6 Hybrid	F1 Hybrid	N
DP-6 Hybrid	F1 Hybrid	N
DP-6 Hybrid	F1 Hybrid	N
DP-6 Hybrid	F1 Hybrid	N
DP-6 Hybrid	F1 Hybrid	Y	N	0.333333
DP-6 Hybrid	F1 Hybrid	N
DP-6 Hybrid	F1 Hybrid	N
DP-6 Hybrid	F1 Hybrid	N
DP-6 Hybrid	F1 Hybrid	N
DP-6 Hybrid	F1 Hybrid	N
DP-6 Hybrid	F1 Hybrid	N
DP-6 Hybrid	F1 Hybrid	N
DP-6 Hybrid	F1 Hybrid	N
DP-6 Hybrid	F1 Hybrid	N
DP-6 Hybrid	F1 Hybrid	N	N	0.0666667
DP-6 Hybrid	F1 Hybrid	N
DP-6 Hybrid	F1 Hybrid	N
DP-6 Hybrid	F1 Hybrid	N
DP-6 Hybrid	F1 Hybrid	N
DP-6 Hybrid	F1 Hybrid	N
DP-6 Hybrid	SimC4	N
DP-6 Hybrid	SimC4	Y	N	0.333333
DP-6 Hybrid	SimC4	N
DP-6 Hybrid	SimC4	N
DP-6 Hybrid	SimC4	N
DP-6 Hybrid	SimC4	Y	N	0.233333
DP-6 Hybrid	SimC4	Y	N	0.2
DP-6 Hybrid	SimC4	N
DP-6 Hybrid	SimC4	N
DP-6 Hybrid	SimC4	N
DP-6 Hybrid	SimC4	Y	Y	0.0714286
DP-6 Hybrid	SimC4	N
DP-6 Hybrid	SimC4	N
DP-6 Hybrid	SimC4	N	N	0.0666667
DP-6 Hybrid	SimC4	N
DP-6 Hybrid	SimC4	N
DP-6 Hybrid	SimC4	N
DP-6 Hybrid	SimC4	N	N	0.0333333
DP-6 Hybrid	SimC4	Y	N	0.133333
DP-6 Hybrid	SimC4	N	N	0.1
DP-6 Hybrid	SimC4	Y	N	0.166667
DP-6 Hybrid	SimC4	N
DP-6 Hybrid	SimC4	N	N	0.0666667
DP-6 Hybrid	SimC4	N
DP-6 Hybrid	SimC4	N	N	0.0666667
DP-6 Hybrid	SimC4	N
DP-6 Hybrid	SimC4	N
DP-6 Hybrid	SimC4	Y	N	0.266667
DP-6 Hybrid	SimC4	N
DP-6 Hybrid	SimC4	Y	N	0.266667
DP-6 Hybrid	SimC4	N	N	0.1
DP-7 Hybrid	CanS	N
DP-7 Hybrid	CanS	N
DP-7 Hybrid	CanS	N
DP-7 Hybrid	CanS	N
DP-7 Hybrid	CanS	N
DP-7 Hybrid	CanS	N
DP-7 Hybrid	CanS	N
DP-7 Hybrid	CanS	N
DP-7 Hybrid	CanS	N
DP-7 Hybrid	CanS	N
DP-7 Hybrid	F1 hybrid	N
DP-7 Hybrid	F1 hybrid	Y	N	0.133333
DP-7 Hybrid	F1 hybrid	N
DP-7 Hybrid	F1 hybrid	N
DP-7 Hybrid	F1 hybrid	N	N	0.0333333
DP-7 Hybrid	F1 hybrid	N
DP-7 Hybrid	F1 hybrid	N
DP-7 Hybrid	F1 hybrid	N
DP-7 Hybrid	F1 Hybrid	N
DP-7 Hybrid	F1 Hybrid	N
DP-7 Hybrid	F1 Hybrid	N
DP-7 Hybrid	F1 Hybrid	N
DP-7 Hybrid	F1 Hybrid	N
DP-7 Hybrid	F1 Hybrid	N
DP-7 Hybrid	F1 Hybrid	N
DP-7 Hybrid	F1 Hybrid	N		0.0666667
DP-7 Hybrid	F1 Hybrid	N
DP-7 Hybrid	F1 Hybrid	N
DP-7 Hybrid	F1 Hybrid	N
DP-7 Hybrid	F1 Hybrid	N
DP-7 Hybrid	F1 Hybrid	N
DP-7 Hybrid	F1 Hybrid	N
DP-7 Hybrid	F1 Hybrid	N
DP-7 Hybrid	F1 Hybrid	N
DP-7 Hybrid	F1 Hybrid	N
DP-7 Hybrid	F1 Hybrid	N
DP-7 Hybrid	F1 Hybrid	N
DP-7 Hybrid	F1 Hybrid	N
DP-7 Hybrid	SimC4	N
DP-7 Hybrid	SimC4	N
DP-7 Hybrid	SimC4	N
DP-7 Hybrid	SimC4	N
DP-7 Hybrid	SimC4	N	N	0.0666667
DP-7 Hybrid	SimC4	N
DP-7 Hybrid	SimC4	N
DP-7 Hybrid	SimC4	Y	N	0.333333
DP-7 Hybrid	SimC4	N
DP-7 Hybrid	SimC4	N
DP-7 Hybrid	SimC4	N
DP-7 Hybrid	SimC4	Y	N	0.5
DP-7 Hybrid	SimC4	N
DP-7 Hybrid	SimC4	N
DP-7 Hybrid	SimC4	N
DP-7 Hybrid	SimC4	N
DP-7 Hybrid	SimC4	N
DP-7 Hybrid	SimC4	N		0.0333333
DP-7 Hybrid	SimC4	N
DP-7 Hybrid	SimC4	Y		0.266667
DP-7 Hybrid	SimC4	N
DP-7 Hybrid	SimC4	Y	Y	0.222222
DP-7 Hybrid	SimC4	N
DP-7 Hybrid	SimC4	N
DP-7 Hybrid	SimC4	N
DP-7 Hybrid	SimC4	N
DP-7 Hybrid	SimC4	N
DP-7 Hybrid	SimC4	N		0.1
DP-7 Hybrid	SimC4	N		0.0333333
DP-7 Hybrid	SimC4	N
DP-7 Hybrid	SimC4	N
DP-7 Hybrid	SimC4	N
DP-8a Hybrid	CanS	N
DP-8a Hybrid	CanS	N
DP-8a Hybrid	CanS	N
DP-8a Hybrid	CanS	N
DP-8a Hybrid	CanS	N
DP-8a Hybrid	CanS	N
DP-8a Hybrid	CanS	N
DP-8a Hybrid	CanS	N
DP-8a Hybrid	CanS	N
DP-8a Hybrid	CanS	N
DP-8a Hybrid	CanS	N
DP-8a Hybrid	CanS	N
DP-8a Hybrid	CanS	N
DP-8a Hybrid	CanS	N
DP-8a Hybrid	CanS	N
DP-8a Hybrid	F1 Hybrid	N
DP-8a Hybrid	F1 Hybrid	N
DP-8a Hybrid	F1 Hybrid	Y	Y	0.0333333
DP-8a Hybrid	F1 Hybrid	N
DP-8a Hybrid	F1 Hybrid	N
DP-8a Hybrid	F1 Hybrid	N
DP-8a Hybrid	F1 Hybrid	N
DP-8a Hybrid	F1 Hybrid	N
DP-8a Hybrid	F1 Hybrid	N
DP-8a Hybrid	F1 Hybrid	N
DP-8a Hybrid	F1 Hybrid	N
DP-8a Hybrid	F1 Hybrid	N
DP-8a Hybrid	F1 Hybrid	N
DP-8a Hybrid	F1 Hybrid	N
DP-8a Hybrid	F1 Hybrid	N
DP-8a Hybrid	F1 Hybrid	N
DP-8a Hybrid	F1 Hybrid	N
DP-8a Hybrid	F1 Hybrid	N	N	0.0666667
DP-8a Hybrid	F1 Hybrid	N
DP-8a Hybrid	F1 Hybrid	N
DP-8a Hybrid	F1 Hybrid	N
DP-8a Hybrid	F1 Hybrid	N
DP-8a Hybrid	F1 Hybrid	N
DP-8a Hybrid	F1 Hybrid	N
DP-8a Hybrid	F1 Hybrid	N
DP-8a Hybrid	F1 Hybrid	N
DP-8a Hybrid	F1 Hybrid	N
DP-8a Hybrid	F1 Hybrid	N
DP-8a Hybrid	F1 Hybrid	Y	Y	0.0689655
DP-8a Hybrid	F1 Hybrid	N
DP-8a Hybrid	F1 Hybrid	N
DP-8a Hybrid	F1 Hybrid	N
DP-8a Hybrid	SimC4	N
DP-8a Hybrid	SimC4	N	N	0.0333333
DP-8a Hybrid	SimC4	Y	Y	0.037037
DP-8a Hybrid	SimC4	N
DP-8a Hybrid	SimC4	N
DP-8a Hybrid	SimC4	N
DP-8a Hybrid	SimC4	N
DP-8a Hybrid	SimC4	N
DP-8a Hybrid	SimC4	Y	N	0.633333
DP-8a Hybrid	SimC4	N
DP-8a Hybrid	SimC4	N
DP-8a Hybrid	SimC4	N
DP-8a Hybrid	SimC4	N
DP-8a Hybrid	SimC4	N
DP-8a Hybrid	SimC4	N
DP-8a Hybrid	SimC4	N	N	0.0333333
DP-8a Hybrid	SimC4	N	N	0.0333333
DP-8a Hybrid	SimC4	Y	N	0.5
DP-8a Hybrid	SimC4	N
DP-8a Hybrid	SimC4	N
DP-8a Hybrid	SimC4	N	N	0.0333333
DP-8a Hybrid	SimC4	N
DP-8a Hybrid	SimC4	N
DP-8a Hybrid	SimC4	N
DP-8a Hybrid	SimC4	N
DP-8a Hybrid	SimC4	Y	N	0.366667
DP-8a Hybrid	SimC4	Y	Y	0.5
DP-8a Hybrid	SimC4	N	N	0.1
DP-8a Hybrid	SimC4	Y	N	0.4
DP-8a Hybrid	SimC4	N
DP-8a Hybrid	SimC4	Y	N	0.2
DP-8a Hybrid	SimC4	N
DP-8B Hybrid	F1 hybrid	N	N	0.0333333
DP-8B Hybrid	F1 hybrid	N	N	0.0333333
DP-8B Hybrid	F1 hybrid	N	N	0.0666667
DP-8B Hybrid	F1 hybrid	N	N	0.1
DP-8B Hybrid	F1 hybrid	Y	N	0.266667
DP-8B Hybrid	F1 hybrid	Y	N	0.366667
DP-8B Hybrid	F1 hybrid	Y	N	0.5
DP-8B Hybrid	F1 hybrid	N
DP-8B Hybrid	F1 hybrid	N
DP-8B Hybrid	F1 hybrid	N
DP-8B Hybrid	F1 hybrid	N
DP-8B Hybrid	F1 hybrid	N
DP-8B Hybrid	F1 hybrid	N
DP-8B Hybrid	SimC4	N	N	0.0333333
DP-8B Hybrid	SimC4	N	N	0.0333333
DP-8B Hybrid	SimC4	N	N	0.0666667
DP-8B Hybrid	SimC4	Y	Y	0.0714286
DP-8B Hybrid	SimC4	N	N	0.1
DP-8B Hybrid	SimC4	Y	N	0.2
DP-8B Hybrid	SimC4	Y	N	0.4
DP-8B Hybrid	SimC4	Y	N	0.433333
DP-8B Hybrid	SimC4	Y	N	0.466667
DP-8B Hybrid	SimC4	Y	N	0.5
DP-8B Hybrid	SimC4	Y	N	0.5
DP-8B Hybrid	SimC4	Y	N	0.6
DP-8B Hybrid	SimC4	N
DP-9 Hybrid	CanS	N
DP-9 Hybrid	CanS	N
DP-9 Hybrid	CanS	N
DP-9 Hybrid	CanS	N
DP-9 Hybrid	CanS	N
DP-9 Hybrid	CanS	N
DP-9 Hybrid	CanS	N
DP-9 Hybrid	CanS	N
DP-9 Hybrid	CanS	N
DP-9 hybrid	F1 hybrid	Y	N	0.233333
DP-9 hybrid	F1 hybrid	N
DP-9 hybrid	F1 hybrid	Y	N	0.266667
DP-9 hybrid	F1 hybrid	N
DP-9 hybrid	F1 hybrid	N
DP-9 hybrid	F1 hybrid	N
DP-9 hybrid	F1 hybrid	Y	N	0.133333
DP-9 hybrid	F1 hybrid	N	N	0.1
DP-9 hybrid	F1 hybrid	Y	Y	0.037037
DP-9 hybrid	F1 hybrid	N
DP-9 hybrid	F1 hybrid	N	N	0.0333333
DP-9 hybrid	F1 hybrid	Y	N	0.3
DP-9 hybrid	F1 hybrid	N
DP-9 hybrid	F1 hybrid	Y	N	0.3
DP-9 hybrid	F1 hybrid	N	N	0.0333333
DP-9 hybrid	F1 hybrid	Y	N	0.166667
DP-9 Hybrid	F1 Hybrid	Y	Y	0.230769
DP-9 Hybrid	F1 Hybrid	Y	Y	0.4
DP-9 Hybrid	F1 Hybrid	N
DP-9 Hybrid	F1 Hybrid	N
DP-9 Hybrid	F1 Hybrid	N
DP-9 Hybrid	F1 Hybrid	Y	N	0.333333
DP-9 Hybrid	F1 Hybrid	Y	N	0.2
DP-9 Hybrid	F1 Hybrid	Y	N	0.133333
DP-9 Hybrid	F1 Hybrid	N
DP-9 Hybrid	F1 Hybrid	Y	N	0.166667
DP-9 Hybrid	F1 Hybrid	Y	Y	0.470588
DP-9 Hybrid	F1 Hybrid	N
DP-9 Hybrid	F1 Hybrid	N	N	0.0666667
DP-9 Hybrid	F1 Hybrid	N	N	0.0666667
DP-9 Hybrid	F1 Hybrid	Y	N	0.2
DP-9 Hybrid	F1 Hybrid	N	N	0.0333333
DP-9 Hybrid	F1 Hybrid	Y	N	0.7
DP-9 Hybrid	F1 Hybrid	Y	N	0.2
DP-9 Hybrid	F1 Hybrid	N
DP-9 Hybrid	F1 Hybrid	N	N	0.0333333
DP-9 Hybrid	F1 Hybrid	Y	N	0.333333
DP-9 Hybrid	F1 Hybrid	N
DP-9 Hybrid	F1 Hybrid	N
DP-9 Hybrid	F1 Hybrid	Y	N	0.133333
DP-9 Hybrid	F1 Hybrid	N
DP-9 Hybrid	F1 Hybrid	N
DP-9 Hybrid	F1 Hybrid	N
DP-9 Hybrid	F1 Hybrid	N	N	0.0666667
DP-9 Hybrid	F1 Hybrid	Y	N	0.333333
DP-9 Hybrid	F1 Hybrid	N	N	0.0666667
DP-9 Hybrid	F1 Hybrid	Y	N	0.133333
DP-9 hybrid	SimC4	N	N	0.0333333
DP-9 hybrid	SimC4	N
DP-9 hybrid	SimC4	N
DP-9 hybrid	SimC4	N
DP-9 hybrid	SimC4	N
DP-9 hybrid	SimC4	N
DP-9 hybrid	SimC4	N
DP-9 hybrid	SimC4	N	N	0.1
DP-9 hybrid	SimC4	N	N	0.0333333
DP-9 hybrid	SimC4	N	N	0.0333333
DP-9 hybrid	SimC4	N
DP-9 hybrid	SimC4	N
DP-9 hybrid	SimC4	N
DP-9 hybrid	SimC4	N
DP-9 Hybrid	SimC4	N
DP-9 Hybrid	SimC4	N
DP-9 Hybrid	SimC4	N
DP-9 Hybrid	SimC4	N
DP-9 Hybrid	SimC4	N
DP-9 Hybrid	SimC4	N
DP-9 Hybrid	SimC4	N
DP-9 Hybrid	SimC4	N	N	0.0333333
DP-9 Hybrid	SimC4	N
DP-9 Hybrid	SimC4	Y	N	0.133333
DP-9 Hybrid	SimC4	N	N	0.0333333
DP-9 Hybrid	SimC4	N	N	0.0333333
DP-9 Hybrid	SimC4	N	N	0.0333333
DP-9 Hybrid	SimC4	Y	N	0.366667
DP-9 Hybrid	SimC4	N
DP-9 Hybrid	SimC4	N
DP-9 Hybrid	SimC4	N	N	0.0333333
DP-9 Hybrid	SimC4	N	N	0.1
DP-9 Hybrid	SimC4	N
DP-9 Hybrid	SimC4	Y	N	0.3
DP-9 Hybrid	SimC4	Y	N	0.166667
DP-9 Hybrid	SimC4	N	N	0.0333333
DP-9 Hybrid	SimC4	N	N	0.1
DP-9 Hybrid	SimC4	N
DP-9 Hybrid	SimC4	N
DP-9 Hybrid	SimC4	N	N	0.0666667
DP-9 Hybrid	SimC4	Y	N	0.166667
DP-9 Hybrid	SimC4	N	N	0.0666667
DP-1 Hybrid	F1 Hybrid	N	N	0.0333333
DP-1 Hybrid	F1 Hybrid	N	N	0.0333333
DP-1 Hybrid	F1 Hybrid	N	N	0.0666667
DP-1 Hybrid	F1 Hybrid	N	N	0.0666667
DP-1 Hybrid	F1 Hybrid	Y	N	0.166667
DP-1 Hybrid	F1 Hybrid	Y	N	0.333333
DP-1 Hybrid	F1 Hybrid	Y	Y	0.366667
DP-1 Hybrid	F1 Hybrid	Y	Y	0.4
DP-1 Hybrid	F1 Hybrid	N
DP-1 Hybrid	F1 Hybrid	N
DP-1 Hybrid	F1 Hybrid	N
DP-1 Hybrid	F1 Hybrid	N
DP-1 Hybrid	F1 Hybrid	N
DP-1 Hybrid	F1 Hybrid	N
DP-1 Hybrid	F1 Hybrid	N
DP-1 Hybrid	F1 Hybrid	N
DP-1 Hybrid	F1 Hybrid	N
DP-1 Hybrid	F1 Hybrid	N
DP-1 Hybrid	F1 Hybrid	N
DP-1 Hybrid	F1 Hybrid	N
DP-1 Hybrid	F1 Hybrid	N
DP-1 Hybrid	F1 Hybrid	N
DP-1 Hybrid	F1 Hybrid	N
DP-1 Hybrid	F1 Hybrid	N
DP-1 Hybrid	SimC4	N	N	0.0333333
DP-1 Hybrid	SimC4	N	N	0.0333333
DP-1 Hybrid	SimC4	Y	Y	0.0526316
DP-1 Hybrid	SimC4	Y	N	0.133333
DP-1 Hybrid	SimC4	Y	N	0.166667
DP-1 Hybrid	SimC4	Y	N	0.166667
DP-1 Hybrid	SimC4	Y	N	0.2
DP-1 Hybrid	SimC4	Y	N	0.2
DP-1 Hybrid	SimC4	Y	N	0.3
DP-1 Hybrid	SimC4	Y	N	0.333333
DP-1 Hybrid	SimC4	Y	N	0.433333
DP-1 Hybrid	SimC4	Y	Y	0.4375
DP-1 Hybrid	SimC4	Y	N	0.7
DP-1 Hybrid	SimC4	N	N	0.0333333
DP-1 Hybrid	SimC4	N
DP-1 Hybrid	SimC4	N
DP-1 Hybrid	SimC4	N
DP-1 Hybrid	SimC4	N
DP-1 Hybrid	SimC4	N
DP-1 Hybrid	SimC4	N
DP-1 Hybrid	SimC4	N
DP-1 Hybrid	SimC4	N
DP-1 Hybrid	SimC4	N
DP-1 Hybrid	SimC4	N
DP-1 Hybrid	SimC4	N
DP-1 Hybrid	SimC4	N
DP-12 Hybrid	F1 Hybrid	N	N	0.0333333
DP-12 Hybrid	F1 Hybrid	N	N	0.0666667
DP-12 Hybrid	F1 Hybrid	N	N	0.0666667
DP-12 Hybrid	F1 Hybrid	N	N	0.0666667
DP-12 Hybrid	F1 Hybrid	N	N	0.1
DP-12 Hybrid	F1 Hybrid	Y	N	0.133333
DP-12 Hybrid	F1 Hybrid	Y	N	0.166667
DP-12 Hybrid	F1 Hybrid	Y	N	0.166667
DP-12 Hybrid	F1 Hybrid	Y	N	0.166667
DP-12 Hybrid	F1 Hybrid	Y	N	0.2
DP-12 Hybrid	F1 Hybrid	Y	N	0.2
DP-12 Hybrid	F1 Hybrid	Y	N	0.233333
DP-12 Hybrid	F1 Hybrid	Y	Y	0.285714
DP-12 Hybrid	F1 Hybrid	Y	Y	0.285714
DP-12 Hybrid	F1 Hybrid	Y	Y	0.5
DP-12 Hybrid	F1 Hybrid	Y	Y	0.5
DP-12 Hybrid	F1 Hybrid	N
DP-12 Hybrid	F1 Hybrid	N
DP-12 Hybrid	F1 Hybrid	N
DP-12 Hybrid	F1 Hybrid	N
DP-12 Hybrid	F1 Hybrid	N
DP-12 Hybrid	F1 Hybrid	N
DP-12 Hybrid	F1 Hybrid	N
DP-12 Hybrid	F1 Hybrid	N
DP-12 Hybrid	F1 Hybrid	N
DP-12 Hybrid	F1 Hybrid	N
DP-12 Hybrid	F1 Hybrid	N
DP-12 Hybrid	F1 Hybrid	N
DP-12 Hybrid	SimC4	N	N	0.0333333
DP-12 Hybrid	SimC4	N	N	0.0333333
DP-12 Hybrid	SimC4	N	N	0.0333333
DP-12 Hybrid	SimC4	N	N	0.0333333
DP-12 Hybrid	SimC4	N	N	0.0666667
DP-12 Hybrid	SimC4	N	N	0.1
DP-12 Hybrid	SimC4	Y	N	0.133333
DP-12 Hybrid	SimC4	Y	Y	0.2
DP-12 Hybrid	SimC4	Y	Y	0.263158
DP-12 Hybrid	SimC4	Y	N	0.266667
DP-12 Hybrid	SimC4	Y	N	0.3
DP-12 Hybrid	SimC4	Y	N	0.366667
DP-12 Hybrid	SimC4	Y	N	0.4
DP-12 Hybrid	SimC4	Y	Y	0.4
DP-12 Hybrid	SimC4	Y	N	0.433333
DP-12 Hybrid	SimC4	Y	N	0.533333
DP-12 Hybrid	SimC4	Y	Y	0.666667
DP-12 Hybrid	SimC4	Y	N	0.733333
DP-12 Hybrid	SimC4	N
DP-12 Hybrid	SimC4	N
DP-12 Hybrid	SimC4	N
DP-12 Hybrid	SimC4	N
DP-12 Hybrid	SimC4	N
DP-12 Hybrid	SimC4	N
DP-12 Hybrid	SimC4	N
DP-12 Hybrid	SimC4	N
DP-13 Hybrid	F1 Hybrid	N	N	0.0333333
DP-13 Hybrid	F1 Hybrid	N	N	0.0666667
DP-13 Hybrid	F1 Hybrid	N	N	0.0666667
DP-13 Hybrid	F1 Hybrid	N	N	0.0666667
DP-13 Hybrid	F1 Hybrid	N	N	0.0666667
DP-13 Hybrid	F1 Hybrid	N	N	0.0666667
DP-13 Hybrid	F1 Hybrid	Y	Y	0.0769231
DP-13 Hybrid	F1 Hybrid	N	N	0.1
DP-13 Hybrid	F1 Hybrid	N	N	0.1
DP-13 Hybrid	F1 Hybrid	Y	Y	0.117647
DP-13 Hybrid	F1 Hybrid	Y	N	0.133333
DP-13 Hybrid	F1 Hybrid	Y	Y	0.173913
DP-13 Hybrid	F1 Hybrid	Y	Y	0.692308
DP-13 Hybrid	F1 Hybrid	N
DP-13 Hybrid	F1 Hybrid	N
DP-13 Hybrid	F1 Hybrid	N
DP-13 Hybrid	F1 Hybrid	N
DP-13 Hybrid	F1 Hybrid	N
DP-13 Hybrid	F1 Hybrid	N
DP-13 Hybrid	F1 Hybrid	N
DP-13 Hybrid	F1 Hybrid	N
DP-13 Hybrid	F1 Hybrid	N
DP-13 Hybrid	F1 Hybrid	N
DP-13 Hybrid	SimC4	N	N	0.0333333
DP-13 Hybrid	SimC4	N	N	0.0333333
DP-13 Hybrid	SimC4	N	N	0.0333333
DP-13 Hybrid	SimC4	N	N	0.0666667
DP-13 Hybrid	SimC4	N	N	0.1
DP-13 Hybrid	SimC4	Y	N	0.166667
DP-13 Hybrid	SimC4	Y	N	0.214286
DP-13 Hybrid	SimC4	Y	N	0.266667
DP-13 Hybrid	SimC4	Y	N	0.266667
DP-13 Hybrid	SimC4	Y	N	0.266667
DP-13 Hybrid	SimC4	Y	N	0.3
DP-13 Hybrid	SimC4	Y	N	0.466667
DP-13 Hybrid	SimC4	Y	N	0.5
DP-13 Hybrid	SimC4	Y	N	0.5
DP-13 Hybrid	SimC4	Y	Y	0.5
DP-13 Hybrid	SimC4	Y	N	0.566667
DP-13 Hybrid	SimC4	Y	N	0.6
DP-13 Hybrid	SimC4	Y	N	0.6
DP-13 Hybrid	SimC4	Y	N	0.666667
DP-13 Hybrid	SimC4	Y	Y	0.666667
DP-13 Hybrid	SimC4	N
DP-13 Hybrid	SimC4	N
DP-13 Hybrid	SimC4	N
DP-13 Hybrid	SimC4	N
DP-13 Hybrid	SimC4	N
DP-13 Hybrid	SimC4	N
DP-4 Hybrid	F1 Hybrid	N	N	0.0333333
DP-4 Hybrid	F1 Hybrid	N	N	0.0333333
DP-4 Hybrid	F1 Hybrid	N	N	0.0333333
DP-4 Hybrid	F1 Hybrid	N	N	0.0333333
DP-4 Hybrid	F1 Hybrid	N	N	0.0333333
DP-4 Hybrid	F1 Hybrid	N	N	0.0333333
DP-4 Hybrid	F1 Hybrid	N	N	0.0333333
DP-4 Hybrid	F1 Hybrid	N	N	0.0666667
DP-4 Hybrid	F1 Hybrid	N	N	0.1
DP-4 Hybrid	F1 Hybrid	N	N	0.1
DP-4 Hybrid	F1 Hybrid	N	N	0.1
DP-4 Hybrid	F1 Hybrid	Y	Y	0.173913
DP-4 Hybrid	F1 Hybrid	Y	N	0.2
DP-4 Hybrid	F1 Hybrid	Y	N	0.2
DP-4 Hybrid	F1 Hybrid	Y	N	0.233333
DP-4 Hybrid	F1 Hybrid	Y	N	0.233333
DP-4 Hybrid	F1 Hybrid	Y	N	0.3
DP-4 Hybrid	F1 Hybrid	y	N	0.3
DP-4 Hybrid	F1 Hybrid	N
DP-4 Hybrid	F1 Hybrid	N
DP-4 Hybrid	F1 Hybrid	N
DP-4 Hybrid	F1 Hybrid	N
DP-4 Hybrid	F1 Hybrid	N
DP-4 Hybrid	F1 Hybrid	N
DP-4 Hybrid	F1 Hybrid	N
DP-4 Hybrid	F1 Hybrid	N
DP-4 Hybrid	SimC4	N	N	0.0333333
DP-4 Hybrid	SimC4	N	N	0.0333333
DP-4 Hybrid	SimC4	Y	Y	0.0344828
DP-4 Hybrid	SimC4	Y	Y	0.0434783
DP-4 Hybrid	SimC4	N	N	0.0666667
DP-4 Hybrid	SimC4	N	N	0.0666667
DP-4 Hybrid	SimC4	Y	Y	0.0666667
DP-4 Hybrid	SimC4	Y	Y	0.0666667
DP-4 Hybrid	SimC4	Y	N	0.133333
DP-4 Hybrid	SimC4	Y	Y	0.166667
DP-4 Hybrid	SimC4	Y	N	0.2
DP-4 Hybrid	SimC4	Y	Y	0.25
DP-4 Hybrid	SimC4	Y	N	0.3
DP-4 Hybrid	SimC4	Y	N	0.3
DP-4 Hybrid	SimC4	Y	N	0.3
DP-4 Hybrid	SimC4	Y	N	0.333333
DP-4 Hybrid	SimC4	Y	N	0.366667
DP-4 Hybrid	SimC4	Y	N	0.366667
DP-4 Hybrid	SimC4	Y	N	0.433333
DP-4 Hybrid	SimC4	Y	N	0.5
DP-4 Hybrid	SimC4	Y	Y	0.533333
DP-4 Hybrid	SimC4	N
DP-4 Hybrid	SimC4	N
DP-4 Hybrid	SimC4	N
DP-8a Hybrid	F1 Hybrid	N	N	0.0333333
DP-8a Hybrid	F1 Hybrid	N	N	0.0333333
DP-8a Hybrid	F1 Hybrid	N	N	0.0333333
DP-8a Hybrid	F1 Hybrid	N	N	0.0526316
DP-8a Hybrid	F1 Hybrid	N	N	0.0666667
DP-8a Hybrid	F1 Hybrid	N	N	0.0666667
DP-8a Hybrid	F1 Hybrid	N	N	0.1
DP-8a Hybrid	F1 Hybrid	N	N	0.1
DP-8a Hybrid	F1 Hybrid	N	N	0.1
DP-8a Hybrid	F1 Hybrid	Y	N	0.166667
DP-8a Hybrid	F1 Hybrid	Y	N	0.466667
DP-8a Hybrid	F1 Hybrid	Y	Y	0.846154
DP-8a Hybrid	F1 Hybrid	N
DP-8a Hybrid	F1 Hybrid	N
DP-8a Hybrid	F1 Hybrid	N
DP-8a Hybrid	F1 Hybrid	N
DP-8a Hybrid	F1 Hybrid	N
DP-8a Hybrid	F1 Hybrid	N
DP-8a Hybrid	F1 Hybrid	N
DP-8a Hybrid	F1 Hybrid	N
DP-8a Hybrid	F1 Hybrid	N
DP-8a Hybrid	F1 Hybrid	N
DP-8a Hybrid	F1 Hybrid	N
DP-8a Hybrid	F1 Hybrid	N
DP-8a Hybrid	F1 Hybrid	N
DP-8a Hybrid	SimC4	N	N	0.0333333
DP-8a Hybrid	SimC4	N	N	0.0333333
DP-8a Hybrid	SimC4	N	N	0.0333333
DP-8a Hybrid	SimC4	N	N	0.0333333
DP-8a Hybrid	SimC4	Y	Y	0.04
DP-8a Hybrid	SimC4	N	N	0.0666667
DP-8a Hybrid	SimC4	N	N	0.0666667
DP-8a Hybrid	SimC4	Y		0.2
DP-8a Hybrid	SimC4	Y	N	0.366667
DP-8a Hybrid	SimC4	Y	N	0.4
DP-8a Hybrid	SimC4	Y	N	0.4
DP-8a Hybrid	SimC4	Y	N	0.766667
DP-8a Hybrid	SimC4	N
DP-8a Hybrid	SimC4	N
DP-8a Hybrid	SimC4	N
DP-8a Hybrid	SimC4	N
DP-8a Hybrid	SimC4	N
DP-8a Hybrid	SimC4	N
DP-8a Hybrid	SimC4	N
DP-8a Hybrid	SimC4	N
DP-8a Hybrid	SimC4	N
DP-8a Hybrid	SimC4	N
DP-8a Hybrid	SimC4	N
DP-8a Hybrid	SimC4	N
DP-8a Hybrid	SimC4	N
DP-9 Hybrid	F1 Hybrid	N	N	0.0333333
DP-9 Hybrid	F1 Hybrid	N	N	0.0333333
DP-9 Hybrid	F1 Hybrid	N	N	0.0333333
DP-9 Hybrid	F1 Hybrid	N	N	0.0333333
DP-9 Hybrid	F1 Hybrid	N	N	0.0526316
DP-9 Hybrid	F1 Hybrid	Y	N	0.133333
DP-9 Hybrid	F1 Hybrid	Y	N	0.166667
DP-9 Hybrid	F1 Hybrid	Y	N	0.166667
DP-9 Hybrid	F1 Hybrid	Y	N	0.166667
DP-9 Hybrid	F1 Hybrid	Y		0.233333
DP-9 Hybrid	F1 Hybrid	Y	Y	0.25
DP-9 Hybrid	F1 Hybrid	Y	N	0.266667
DP-9 Hybrid	F1 Hybrid	Y	N	0.366667
DP-9 Hybrid	F1 Hybrid	Y	N	0.466667
DP-9 Hybrid	F1 Hybrid	Y	Y	0.533333
DP-9 Hybrid	F1 Hybrid	Y	N	0.6
DP-9 Hybrid	F1 Hybrid	N
DP-9 Hybrid	F1 Hybrid	N
DP-9 Hybrid	F1 Hybrid	N
DP-9 Hybrid	F1 Hybrid	N
DP-9 Hybrid	F1 Hybrid	N
DP-9 Hybrid	F1 Hybrid	N
DP-9 Hybrid	F1 Hybrid	N
DP-9 Hybrid	F1 Hybrid	N
DP-9 Hybrid	SimC4	N	N	0.0333333
DP-9 Hybrid	SimC4	N	N	0.0333333
DP-9 Hybrid	SimC4	N	N	0.0333333
DP-9 Hybrid	SimC4	N	N	0.0333333
DP-9 Hybrid	SimC4	Y	N	0.133333
DP-9 Hybrid	SimC4	Y	N	0.166667
DP-9 Hybrid	SimC4	Y	N	0.233333
DP-9 Hybrid	SimC4	Y	N	0.233333
DP-9 Hybrid	SimC4	Y	N	0.4
DP-9 Hybrid	SimC4	Y	N	0.4
DP-9 Hybrid	SimC4	Y	Y	0.545455
DP-9 Hybrid	SimC4	N
DP-9 Hybrid	SimC4	N
DP-9 Hybrid	SimC4	N
DP-9 Hybrid	SimC4	N
DP-9 Hybrid	SimC4	N
DP-9 Hybrid	SimC4	N
DP-9 Hybrid	SimC4	N
DP-9 Hybrid	SimC4	N
DP-9 Hybrid	SimC4	N
DP-9 Hybrid	SimC4	N
DP-9 Hybrid	SimC4	N
DP-9 Hybrid	SimC4	N
DP-9 Hybrid	SimC4	N
DP-9 Hybrid	SimC4	N
DPPK23 Hybrid	F1 Hybrid	N	N	0.0333333
DPPK23 Hybrid	F1 Hybrid	N	N	0.0333333
DPPK23 Hybrid	F1 Hybrid	N	N	0.0333333
DPPK23 Hybrid	F1 Hybrid	N	N	0.0333333
DPPK23 Hybrid	F1 Hybrid	N	N	0.0333333
DPPK23 Hybrid	F1 Hybrid	N	N	0.0666667
DPPK23 Hybrid	F1 Hybrid	N	N	0.0666667
DPPK23 Hybrid	F1 Hybrid	N	N	0.1
DPPK23 Hybrid	F1 Hybrid	N	N	0.1
DPPK23 Hybrid	F1 Hybrid	N	N	0.1
DPPK23 Hybrid	F1 Hybrid	Y	Y	0.103448
DPPK23 Hybrid	F1 Hybrid	Y	N	0.133333
DPPK23 Hybrid	F1 Hybrid	Y	N	0.333333
DPPK23 Hybrid	F1 Hybrid	N
DPPK23 Hybrid	F1 Hybrid	N
DPPK23 Hybrid	F1 Hybrid	N
DPPK23 Hybrid	F1 Hybrid	N
DPPK23 Hybrid	F1 Hybrid	N
DPPK23 Hybrid	F1 Hybrid	N
DPPK23 Hybrid	F1 Hybrid	N
DPPK23 Hybrid	F1 Hybrid	N
DPPK23 Hybrid	F1 Hybrid	N
DPPK23 Hybrid	F1 Hybrid	N
DPPK23 Hybrid	F1 Hybrid	N
DPPK23 Hybrid	F1 Hybrid	N
DPPK23 Hybrid	F1 Hybrid	N
DPPK23 Hybrid	F1 Hybrid	N
DPPK23 Hybrid	SimC4	N	N	0.0333333
DPPK23 Hybrid	SimC4	N	N	0.0333333
DPPK23 Hybrid	SimC4	N	N	0.0666667
DPPK23 Hybrid	SimC4	N	N	0.1
DPPK23 Hybrid	SimC4	Y	Y	0.157895
DPPK23 Hybrid	SimC4	Y	N	0.2
DPPK23 Hybrid	SimC4	Y	N	0.2
DPPK23 Hybrid	SimC4	Y	N	0.233333
DPPK23 Hybrid	SimC4	Y	N	0.233333
DPPK23 Hybrid	SimC4	Y	Y	0.233333
DPPK23 Hybrid	SimC4	Y	N	0.333333
DPPK23 Hybrid	SimC4	Y	N	0.4
DPPK23 Hybrid	SimC4	Y	N	0.433333
DPPK23 Hybrid	SimC4	Y	N	0.6
DPPK23 Hybrid	SimC4	Y	N	0.6
DPPK23 Hybrid	SimC4	Y	N	0.7
DPPK23 Hybrid	SimC4	N
DPPK23 Hybrid	SimC4	N
DPPK23 Hybrid	SimC4	N
DPPK23 Hybrid	SimC4	N
DPPK23 Hybrid	SimC4	N
DPPK23 Hybrid	SimC4	N
DPPK23 Hybrid	SimC4	N
DPPK23 Hybrid	SimC4	N
DPPK23 Hybrid	SimC4	N
DPPK23 Hybrid	SimC4	N

## Sheet: BSC100_perfuming
Male genotype	Female Genotype	Court?	Mate?	Proportion Time Spent Courting
DP-9 Hybrid	SimC4+Sham	N
DP-9 Hybrid	SimC4+Sham	N	N	0.0666667
DP-9 Hybrid	SimC4+Sham	N
DP-9 Hybrid	SimC4+Sham	N	N	0.0666667
DP-9 Hybrid	SimC4+Sham	N
DP-9 Hybrid	SimC4+Sham	N
DP-9 Hybrid	SimC4+Sham	Y	N	0.266667
DP-9 Hybrid	SimC4+Sham	N
DP-9 Hybrid	SimC4+Sham	N	N	0.0333333
DP-9 Hybrid	SimC4+Sham	N
DP-9 Hybrid	SimC4+Sham	Y	N	0.2
DP-9 Hybrid	SimC4+Sham	N
DP-9 Hybrid	SimC4+Sham	N
DP-9 Hybrid	SimC4+Sham	N	N	0.0333333
DP-9 Hybrid	SimC4+Sham	N
DP-9 Hybrid	SimC4+Sham	N
DP-9 Hybrid	SimC4+Sham	N	N	0.1
DP-9 Hybrid	SimC4+Sham	N
DP-9 Hybrid	SimC4+Sham	N
DP-9 Hybrid	SimC4+Sham	N
DP-9 Hybrid	SimC4+Sham	N	N	0.0333333
DP-9 Hybrid	SimC4+Sham	N
DP-9 Hybrid	SimC4+Sham	N
DP-9 Hybrid	SimC4+Sham	Y	N	0.133333
DP-9 Hybrid	SimC4+Sham	Y	N	0.233333
DP-9 Hybrid	SimC4+400ul 7,11-HD	N
DP-9 Hybrid	SimC4+400ul 7,11-HD	N
DP-9 Hybrid	SimC4+400ul 7,11-HD	N
DP-9 Hybrid	SimC4+400ul 7,11-HD	Y	N	0.133333
DP-9 Hybrid	SimC4+400ul 7,11-HD	N
DP-9 Hybrid	SimC4+400ul 7,11-HD	Y	N	0.366667
DP-9 Hybrid	SimC4+400ul 7,11-HD	Y	N	0.366667
DP-9 Hybrid	SimC4+400ul 7,11-HD	Y	N	0.3
DP-9 Hybrid	SimC4+400ul 7,11-HD	N
DP-9 Hybrid	SimC4+400ul 7,11-HD	N
DP-9 Hybrid	SimC4+400ul 7,11-HD	Y	N	0.133333
DP-9 Hybrid	SimC4+400ul 7,11-HD	Y	N	0.266667
DP-9 Hybrid	SimC4+400ul 7,11-HD	N
DP-9 Hybrid	SimC4+400ul 7,11-HD	Y	Y	1
DP-9 Hybrid	SimC4+400ul 7,11-HD	Y	Y	0.5
DP-9 Hybrid	SimC4+400ul 7,11-HD	N
DP-9 Hybrid	SimC4+400ul 7,11-HD	N	N	0.0333333
DP-9 Hybrid	SimC4+400ul 7,11-HD	N
DP-9 Hybrid	SimC4+400ul 7,11-HD	N
DP-9 Hybrid	SimC4+400ul 7,11-HD	N
DP-9 Hybrid	SimC4+400ul 7,11-HD	N
DP-9 Hybrid	SimC4+400ul 7,11-HD	Y	N	0.866667
DP-9 Hybrid	SimC4+400ul 7,11-HD	N
DP-9 Hybrid	SimC4+400ul 7,11-HD	N
DP-9 Hybrid	SimC4+400ul 7,11-HD	N	N	0.0666667
DP-9 Hybrid	SimC4+200ul 7,11-HD	N
DP-9 Hybrid	SimC4+200ul 7,11-HD	Y	N	0.3
DP-9 Hybrid	SimC4+200ul 7,11-HD	Y	N	0.4
DP-9 Hybrid	SimC4+200ul 7,11-HD	N
DP-9 Hybrid	SimC4+200ul 7,11-HD	Y	N	0.6
DP-9 Hybrid	SimC4+200ul 7,11-HD	N
DP-9 Hybrid	SimC4+200ul 7,11-HD	Y	N	0.433333
DP-9 Hybrid	SimC4+200ul 7,11-HD	N
DP-9 Hybrid	SimC4+200ul 7,11-HD	N
DP-9 Hybrid	SimC4+200ul 7,11-HD	Y	N	0.3
DP-9 Hybrid	SimC4+200ul 7,11-HD	Y	N	0.233333
DP-9 Hybrid	SimC4+200ul 7,11-HD	N
DP-9 Hybrid	SimC4+200ul 7,11-HD	N
DP-9 Hybrid	SimC4+200ul 7,11-HD	Y	N	0.533333
DP-9 Hybrid	SimC4+200ul 7,11-HD	N
DP-9 Hybrid	SimC4+200ul 7,11-HD	Y	N	0.733333
DP-9 Hybrid	SimC4+200ul 7,11-HD	Y	N	0.133333
DP-9 Hybrid	SimC4+200ul 7,11-HD	N
DP-9 Hybrid	SimC4+200ul 7,11-HD	Y	N	0.3
DP-9 Hybrid	SimC4+200ul 7,11-HD	N
DP-9 Hybrid	SimC4+200ul 7,11-HD	Y	N	0.333333
DP-9 Hybrid	SimC4+200ul 7,11-HD	N
DP-9 Hybrid	SimC4+200ul 7,11-HD	N
DP-9 Hybrid	SimC4+200ul 7,11-HD	N	N	0.0666667
DP-9 Hybrid	SimC4+200ul 7,11-HD	N

## Sheet: BSC100_overlaps
Male genotype	Female Genotype	Court?	Mate?	Proportion Time Spent Courting
DP-9B Hybrid	F1 Hybrid	N
DP-9B Hybrid	F1 Hybrid	N	N	0.0666667			Key
DP-9B Hybrid	F1 Hybrid	N
DP-9B Hybrid	F1 Hybrid	N	N	0.0666667			BSC49	DP-9B
DP-9B Hybrid	F1 Hybrid	N					BSC317	DP-9C
DP-9B Hybrid	F1 Hybrid	N					BSC315	DP-9D
DP-9B Hybrid	F1 Hybrid	N					BSC47	DP-9E
DP-9B Hybrid	F1 Hybrid	N					BSC101	DP-9F
DP-9B Hybrid	F1 Hybrid	N	N	0.0666667			BSC54	DP-9I
DP-9B Hybrid	F1 Hybrid	N
DP-9B Hybrid	F1 Hybrid	N
DP-9B Hybrid	F1 Hybrid	N
DP-9B Hybrid	F1 Hybrid	N	N	0.0666667
DP-9B Hybrid	F1 Hybrid	N	N	0.1
DP-9B Hybrid	F1 Hybrid	N	N	0.0666667
DP-9B Hybrid	F1 Hybrid	N	N	0.0333333
DP-9B Hybrid	F1 Hybrid	N
DP-9B Hybrid	F1 Hybrid	N
DP-9B Hybrid	F1 Hybrid	N	N	0.0666667
DP-9B Hybrid	F1 Hybrid	N
DP-9B Hybrid	F1 Hybrid	N
DP-9B Hybrid	F1 Hybrid	N
DP-9B Hybrid	F1 Hybrid	N
DP-9B Hybrid	F1 Hybrid	N
DP-9B Hybrid	F1 Hybrid	N
DP-9B Hybrid	F1 Hybrid	N
DP-9B Hybrid	F1 Hybrid	N
DP-9B Hybrid	F1 Hybrid	N
DP-9B Hybrid	SimC4	N	N	0.1
DP-9B Hybrid	SimC4	N
DP-9B Hybrid	SimC4	N	N	0.1
DP-9B Hybrid	SimC4	N
DP-9B Hybrid	SimC4	N
DP-9B Hybrid	SimC4	N
DP-9B Hybrid	SimC4	N	N	0.1
DP-9B Hybrid	SimC4	N
DP-9B Hybrid	SimC4	N
DP-9B Hybrid	SimC4	Y	N	0.266667
DP-9B Hybrid	SimC4	N	N	0.0666667
DP-9B Hybrid	SimC4	Y	N	0.166667
DP-9B Hybrid	SimC4	N	N	0.0333333
DP-9B Hybrid	SimC4	Y	N	0.133333
DP-9B Hybrid	SimC4	Y	N	0.166667
DP-9B Hybrid	SimC4	Y	N	0.433333
DP-9B Hybrid	SimC4	N	N	0.1
DP-9B Hybrid	SimC4	N	N	0.0333333
DP-9B Hybrid	SimC4	N	N	0.0333333
DP-9B Hybrid	SimC4	N	N	0.0666667
DP-9B Hybrid	SimC4	Y	N	0.133333
DP-9B Hybrid	SimC4	Y	N	0.166667
DP-9B Hybrid	SimC4	Y	N	0.2
DP-9B Hybrid	SimC4	Y	N	0.233333
DP-9B Hybrid	SimC4	Y	N	0.233333
DP-9B Hybrid	SimC4	Y	N	0.3
DP-9B Hybrid	SimC4	Y	Y	0.545455
DP-9D Hybrid	F1 hybrid	N	N	0.0333333
DP-9D Hybrid	F1 hybrid	N	N	0.0333333
DP-9D Hybrid	F1 hybrid	N	N	0.0333333
DP-9D Hybrid	F1 hybrid	Y	Y	0.0454545
DP-9D Hybrid	F1 hybrid	N	N	0.0666667
DP-9D Hybrid	F1 hybrid	Y	Y	0.0833333
DP-9D Hybrid	F1 hybrid	Y	Y	0.125
DP-9D Hybrid	F1 hybrid	Y	N	0.133333
DP-9D Hybrid	F1 hybrid	Y	N	0.133333
DP-9D Hybrid	F1 hybrid	Y	N	0.166667
DP-9D Hybrid	F1 hybrid	Y	N	0.2
DP-9D Hybrid	F1 hybrid	Y	Y	0.210526
DP-9D Hybrid	F1 hybrid	Y	N	0.633333
DP-9D Hybrid	F1 hybrid	N
DP-9D Hybrid	F1 hybrid	N
DP-9D Hybrid	F1 hybrid	N
DP-9D Hybrid	F1 hybrid	N
DP-9D Hybrid	F1 hybrid	N
DP-9D Hybrid	F1 hybrid	N
DP-9D Hybrid	F1 hybrid	N
DP-9D Hybrid	F1 hybrid	N
DP-9D Hybrid	F1 hybrid	N
DP-9D Hybrid	F1 hybrid	N
DP-9D Hybrid	F1 hybrid	N
DP-9D Hybrid	F1 hybrid	N
DP-9D Hybrid	F1 hybrid	N
DP-9D Hybrid	F1 hybrid	N
DP-9D Hybrid	F1 hybrid	N
DP-9D Hybrid	F1 hybrid	N
DP-9D Hybrid	F1 hybrid	N
DP-9D Hybrid	F1 hybrid	N
DP-9D Hybrid	F1 hybrid	N
DP-9D Hybrid	F1 hybrid	N
DP-9D Hybrid	F1 hybrid	N	N
DP-9D Hybrid	F1 hybrid	N
DP-9D Hybrid	F1 hybrid	N
DP-9D Hybrid	F1 Hybrid	N
DP-9D Hybrid	F1 Hybrid	N
DP-9D Hybrid	F1 Hybrid	N
DP-9D Hybrid	F1 Hybrid	Y	Y	0.117647
DP-9D Hybrid	F1 Hybrid	N	N	0.0333333
DP-9D Hybrid	F1 Hybrid	N
DP-9D Hybrid	F1 Hybrid	N	N	0.0333333
DP-9D Hybrid	F1 Hybrid	N
DP-9D Hybrid	F1 Hybrid	N
DP-9D Hybrid	F1 Hybrid	N
DP-9D Hybrid	F1 Hybrid	N
DP-9D Hybrid	F1 Hybrid	Y	N	0.233333
DP-9D Hybrid	F1 Hybrid	N
DP-9D Hybrid	F1 Hybrid	Y	Y	0.192308
DP-9D Hybrid	SimC4	N	N	0.0333333
DP-9D Hybrid	SimC4	N	N	0.0666667
DP-9D Hybrid	SimC4	N	N	0.0666667
DP-9D Hybrid	SimC4	Y	N	0.133333
DP-9D Hybrid	SimC4	Y	N	0.133333
DP-9D Hybrid	SimC4	Y	Y	0.2
DP-9D Hybrid	SimC4	Y	Y	0.2
DP-9D Hybrid	SimC4	Y	Y	0.222222
DP-9D Hybrid	SimC4	Y	N	0.266667
DP-9D Hybrid	SimC4	Y	Y	0.333333
DP-9D Hybrid	SimC4	Y	N	0.366667
DP-9D Hybrid	SimC4	Y	N	0.4
DP-9D Hybrid	SimC4	Y	N	0.4
DP-9D Hybrid	SimC4	Y	Y	0.428571
DP-9D Hybrid	SimC4	Y	Y	0.444444
DP-9D Hybrid	SimC4	Y	N	0.5
DP-9D Hybrid	SimC4	Y	N	0.566667
DP-9D Hybrid	SimC4	N
DP-9D Hybrid	SimC4	N
DP-9D Hybrid	SimC4	N
DP-9D Hybrid	SimC4	N
DP-9D Hybrid	SimC4	N
DP-9D Hybrid	SimC4	N
DP-9D Hybrid	SimC4	N
DP-9D Hybrid	SimC4	N
DP-9D Hybrid	SimC4	N
DP-9D Hybrid	SimC4	N
DP-9D Hybrid	SimC4	N
DP-9D Hybrid	SimC4	N
DP-9D Hybrid	SimC4	N
DP-9D Hybrid	SimC4	N
DP-9D Hybrid	SimC4	N
DP-9D Hybrid	SimC4	N
DP-9D Hybrid	SimC4	N
DP-9D Hybrid	SimC4	Y	Y	0.333333
DP-9D Hybrid	SimC4	Y	N	0.366667
DP-9D Hybrid	SimC4	N	N	0.0333333
DP-9D Hybrid	SimC4	Y	Y	0.0869565
DP-9D Hybrid	SimC4	Y	N	0.266667
DP-9D Hybrid	SimC4	Y	N	0.333333
DP-9D Hybrid	SimC4	Y	N	0.133333
DP-9D Hybrid	SimC4	Y	N	0.266667
DP-9D Hybrid	SimC4	N
DP-9D Hybrid	SimC4	N
DP-9D Hybrid	SimC4	N	N	0.0333333
DP-9D Hybrid	SimC4	Y	N	0.133333
DP-9D Hybrid	SimC4	Y	N	0.133333
DP-9D Hybrid	SimC4	Y	N	0.733333
DP-9E Hybrid	F1 Hybrid	N
DP-9E Hybrid	F1 Hybrid	N
DP-9E Hybrid	F1 Hybrid	N
DP-9E Hybrid	F1 Hybrid	N	N	0.0333333
DP-9E Hybrid	F1 Hybrid	N	N	0.0666667
DP-9E Hybrid	F1 Hybrid	N
DP-9E Hybrid	F1 Hybrid	N
DP-9E Hybrid	F1 Hybrid	Y	N	0.166667
DP-9E Hybrid	F1 Hybrid	N
DP-9E Hybrid	F1 Hybrid	N
DP-9E Hybrid	F1 Hybrid	N	N	0.1
DP-9E Hybrid	F1 Hybrid	Y	N	0.4
DP-9E Hybrid	F1 Hybrid	N
DP-9E Hybrid	F1 Hybrid	Y	N	0.2
DP-9E Hybrid	F1 Hybrid	N	N	0.0333333
DP-9E Hybrid	F1 Hybrid	N	N	0.1
DP-9E Hybrid	F1 Hybrid	Y	N	0.133333
DP-9E Hybrid	F1 Hybrid	N
DP-9E Hybrid	F1 Hybrid	N	N	0.0666667
DP-9E Hybrid	F1 Hybrid	N
DP-9E Hybrid	F1 Hybrid	N
DP-9E Hybrid	F1 Hybrid	N
DP-9E Hybrid	F1 Hybrid	N
DP-9E Hybrid	F1 Hybrid	N
DP-9E Hybrid	F1 Hybrid	N
DP-9E Hybrid	F1 Hybrid	N
DP-9E Hybrid	F1 Hybrid	N
DP-9E Hybrid	F1 Hybrid	N
DP-9E Hybrid	SimC4	N
DP-9E Hybrid	SimC4	N
DP-9E Hybrid	SimC4	N
DP-9E Hybrid	SimC4	N
DP-9E Hybrid	SimC4	Y	N	0.466667
DP-9E Hybrid	SimC4	N	N	0.1
DP-9E Hybrid	SimC4	N
DP-9E Hybrid	SimC4	N
DP-9E Hybrid	SimC4	N
DP-9E Hybrid	SimC4	N	N	0.1
DP-9E Hybrid	SimC4	N	N	0.0333333
DP-9E Hybrid	SimC4	N
DP-9E Hybrid	SimC4	N
DP-9E Hybrid	SimC4	N
DP-9E Hybrid	SimC4	Y	N	0.5
DP-9E Hybrid	SimC4	N
DP-9E Hybrid	SimC4	N
DP-9E Hybrid	SimC4	N
DP-9E Hybrid	SimC4	N	N	0.0333333
DP-9E Hybrid	SimC4	N	N	0.0333333
DP-9E Hybrid	SimC4	N	N	0.0666667
DP-9E Hybrid	SimC4	Y	N	0.233333
DP-9E Hybrid	SimC4	Y	N	0.5
DP-9E Hybrid	SimC4	N
DP-9E Hybrid	SimC4	N
DP-9E Hybrid	SimC4	N
DP-9E Hybrid	SimC4	N
DP-9E Hybrid	SimC4	N
DP-9C	F1 Hybrid	N	N	0.0333333
DP-9C	F1 Hybrid	N	N	0.0333333
DP-9C	F1 Hybrid	N	N	0.0333333
DP-9C	F1 Hybrid	N	N	0.0333333
DP-9C	F1 Hybrid	N	N	0.0333333
DP-9C	F1 Hybrid	N	N	0.0333333
DP-9C	F1 Hybrid	N	N	0.1
DP-9C	F1 Hybrid	Y	Y	0.125
DP-9C	F1 Hybrid	Y	N	0.133333
DP-9C	F1 Hybrid	Y	N	0.566667
DP-9C	F1 Hybrid	N
DP-9C	F1 Hybrid	N
DP-9C	F1 Hybrid	N
DP-9C	F1 Hybrid	N
DP-9C	F1 Hybrid	N
DP-9C	F1 Hybrid	N
DP-9C	F1 Hybrid	N
DP-9C	F1 Hybrid	N
DP-9C	F1 Hybrid	N
DP-9C	F1 Hybrid	N
DP-9C	F1 Hybrid	N
DP-9C	F1 Hybrid	N
DP-9C	F1 Hybrid	N
DP-9C	F1 Hybrid	N
DP-9C	F1 Hybrid	N
DP-9C	F1 Hybrid	N
DP-9C	simC4	N	N	0.0333333
DP-9C	simC4	N	N	0.0333333
DP-9C	simC4	N	N	0.0666667
DP-9C	simC4	N	N	0.1
DP-9C	simC4	Y	N	0.133333
DP-9C	simC4	Y	N	0.133333
DP-9C	simC4	Y	N	0.133333
DP-9C	simC4	Y	N	0.133333
DP-9C	simC4	Y	N	0.2
DP-9C	simC4	Y	N	0.233333
DP-9C	simC4	Y	N	0.333333
DP-9C	simC4	Y	N	0.366667
DP-9C	simC4	Y	N	0.4
DP-9C	simC4	Y	N	0.433333
DP-9C	simC4	Y	N	0.5
DP-9C	simC4	Y	N	0.5
DP-9C	simC4	Y	N	0.5
DP-9C	simC4	Y	N	0.6
DP-9C	simC4	Y	Y	0.625
DP-9C	simC4	N
DP-9C	simC4	N
DP-9C	simC4	N
DP-9C	simC4	N
DP-9C	simC4	N
DP-9C	simC4	N
DP-9C	simC4	N
DP-9C	simC4	N
DP-9E	F1 Hybrid	N	N	0.0333333
DP-9E	F1 Hybrid	N	N	0.0333333
DP-9E	F1 Hybrid	N	N	0.0333333
DP-9E	F1 Hybrid	Y	N	0.166667
DP-9E	F1 Hybrid	Y	N	0.166667
DP-9E	F1 Hybrid	Y	Y	0.166667
DP-9E	F1 Hybrid	Y	N	0.2
DP-9E	F1 Hybrid	Y	N	0.2
DP-9E	F1 Hybrid	Y	N	0.3
DP-9E	F1 Hybrid	Y	N	0.333333
DP-9E	F1 Hybrid	Y	N	0.433333
DP-9E	F1 Hybrid	N
DP-9E	F1 Hybrid	N
DP-9E	F1 Hybrid	N
DP-9E	F1 Hybrid	N
DP-9E	F1 Hybrid	N
DP-9E	F1 Hybrid	N
DP-9E	F1 Hybrid	N
DP-9E	F1 Hybrid	N
DP-9E	F1 Hybrid	N
DP-9E	F1 Hybrid	N
DP-9E	F1 Hybrid	N
DP-9E	F1 Hybrid	N
DP-9E	F1 Hybrid	N
DP-9E	F1 Hybrid	N
DP-9E	F1 Hybrid	N
DP-9E	F1 Hybrid	N
DP-9E	simC4	N	N	0.0333333
DP-9E	simC4	N	N	0.0666667
DP-9E	simC4	Y	N	0.133333
DP-9E	simC4	Y	N	0.2
DP-9E	simC4	Y	N	0.2
DP-9E	simC4	Y	N	0.233333
DP-9E	simC4	Y	N	0.233333
DP-9E	simC4	Y	N	0.233333
DP-9E	simC4	Y	N	0.233333
DP-9E	simC4	Y	N	0.233333
DP-9E	simC4	Y	N	0.266667
DP-9E	simC4	Y	N	0.333333
DP-9E	simC4	Y	N	0.333333
DP-9E	simC4	Y	N	0.366667
DP-9E	simC4	Y	N	0.433333
DP-9E	simC4	Y	N	0.533333
DP-9E	simC4	N
DP-9E	simC4	N
DP-9E	simC4	N
DP-9E	simC4	N
DP-9E	simC4	N
DP-9E	simC4	N
DP-9E	simC4	N
DP-9E	simC4	N
DP-9E	simC4	N
DP-9F	F1 Hybrid	N	N	0.0333333
DP-9F	F1 Hybrid	N	N	0.0666667
DP-9F	F1 Hybrid	N	N	0.0666667
DP-9F	F1 Hybrid	Y	N	0.2
DP-9F	F1 Hybrid	Y	N	0.233333
DP-9F	F1 Hybrid	Y	N	0.233333
DP-9F	F1 Hybrid	Y	N	0.266667
DP-9F	F1 Hybrid	Y	N	0.266667
DP-9F	F1 Hybrid	Y	N	0.333333
DP-9F	F1 Hybrid	Y	N	0.333333
DP-9F	F1 Hybrid	Y	N	0.366667
DP-9F	F1 Hybrid	Y	Y	0.380952
DP-9F	F1 Hybrid	Y	Y	0.4
DP-9F	F1 Hybrid	N
DP-9F	F1 Hybrid	N
DP-9F	F1 Hybrid	N
DP-9F	F1 Hybrid	N
DP-9F	F1 Hybrid	N
DP-9F	F1 Hybrid	N
DP-9F	F1 Hybrid	N
DP-9F	F1 Hybrid	N
DP-9F	F1 Hybrid	N
DP-9F	F1 Hybrid	N
DP-9F	F1 Hybrid	N
DP-9F	F1 Hybrid	N
DP-9F	F1 Hybrid	N
DP-9F	F1 Hybrid	N
DP-9F	simC4	N	N	0.0333333
DP-9F	simC4	N	N	0.0333333
DP-9F	simC4	N	N	0.0333333
DP-9F	simC4	N	N	0.0333333
DP-9F	simC4	N	N	0.0333333
DP-9F	simC4	N	N	0.0666667
DP-9F	simC4	N	N	0.0666667
DP-9F	simC4	N	N	0.0666667
DP-9F	simC4	N	N	0.1
DP-9F	simC4	Y	N	0.133333
DP-9F	simC4	Y	N	0.166667
DP-9F	simC4	Y	N	0.233333
DP-9F	simC4	Y	N	0.3
DP-9F	simC4	Y	N	0.3
DP-9F	simC4	Y	N	0.3
DP-9F	simC4	Y	N	0.3
DP-9F	simC4	Y	N	0.4
DP-9F	simC4	N
DP-9F	simC4	N
DP-9F	simC4	N
DP-9F	simC4	N
DP-9F	simC4	N
DP-9F	simC4	N
DP-9F	simC4	N
DP-9F	simC4	N
DP-9F	simC4	N
DP-9F	simC4	N
DP-9I	F1 Hybrid	N	N	0.0333333
DP-9I	F1 Hybrid	N	N	0.0666667
DP-9I	F1 Hybrid	Y	Y	0.125
DP-9I	F1 Hybrid	Y	Y	0.142857
DP-9I	F1 Hybrid	Y	Y	0.16
DP-9I	F1 Hybrid	Y	N	0.166667
DP-9I	F1 Hybrid	Y	N	0.2
DP-9I	F1 Hybrid	Y	Y	0.37037
DP-9I	F1 Hybrid	Y	N	0.4
DP-9I	F1 Hybrid	N
DP-9I	F1 Hybrid	N
DP-9I	F1 Hybrid	N
DP-9I	F1 Hybrid	N
DP-9I	F1 Hybrid	N
DP-9I	F1 Hybrid	N
DP-9I	F1 Hybrid	N
DP-9I	F1 Hybrid	N
DP-9I	F1 Hybrid	N
DP-9I	F1 Hybrid	N
DP-9I	F1 Hybrid	N
DP-9I	F1 Hybrid	N
DP-9I	F1 Hybrid	N
DP-9I	F1 Hybrid	N
DP-9I	F1 Hybrid	N
DP-9I	F1 Hybrid	N
DP-9I	F1 Hybrid	N
DP-9I	simC4	N	N	0.0333333
DP-9I	simC4	N	N	0.0333333
DP-9I	simC4	N	N	0.0666667
DP-9I	simC4	N	N	0.0666667
DP-9I	simC4	N	N	0.0666667
DP-9I	simC4	N	N	0.0666667
DP-9I	simC4	N	N	0.1
DP-9I	simC4	N	N	0.1
DP-9I	simC4	Y	N	0.166667
DP-9I	simC4	Y	Y	0.166667
DP-9I	simC4	Y	N	0.233333
DP-9I	simC4	Y	N	0.233333
DP-9I	simC4	Y	N	0.266667
DP-9I	simC4	Y	N	0.266667
DP-9I	simC4	Y	Y	0.285714
DP-9I	simC4	Y	N	0.3
DP-9I	simC4	Y	Y	0.5
DP-9I	simC4	Y	N	0.6
DP-9I	simC4	N
DP-9I	simC4	N
DP-9I	simC4	N
DP-9I	simC4	N
DP-9I	simC4	N
DP-9I	simC4	N
DP-9I	simC4	N
DP-9I	simC4	N

## Sheet: melKOs
Male genotype	Female genotype	Court?	Proportion Time Spent Courting	Mate?
cacRNAi bal	canS	Y	0.333333	Y
cac2 bal	canS	Y	1	Y
cac2 bal	canS	Y	0.916667	Y
cac2 bal	canS	Y	0.833333	Y
cac2 bal	canS	Y	1	Y
cac2 bal	canS	Y	1	Y
cac2 bal	canS	Y	1	Y
cac2 bal	canS	Y	1	Y
cac2 bal	canS	Y	0.944444	Y
cac2 bal	canS	Y	1	Y
cac2 bal	canS	Y	0.875	Y
cac2 bal	canS	Y	0.4	Y
cac2 bal	canS	Y	0.833333	N
cac2 bal	canS	N
cac2 bal	canS	Y	0.5	N
cac2 bal	canS	Y	0.666667	Y
cac2 bal	canS	Y	0.571429	Y
cac2 bal	canS	Y	0.888889	Y
cac2 bal	canS	Y	0.625	Y
cac2 bal	canS	Y	0.75	Y
cac2 bal	simC4	Y	0.933333	Y
cac2 bal	simC4	Y	0.666667	N
cac2 bal	simC4	Y	0.933333	N
cac2 bal	simC4	Y	0.933333	N
cac2 bal	simC4	Y	1	N
cac2 bal	simC4	Y	0.9	N
cac2 bal	simC4	Y	1	N
cac2 bal	simC4	Y	0.933333	N
cac2 bal	simC4	Y	0.8	N
cac2 bal	simC4	Y	0.8	N
cac2 bal	simC4	Y	0.3	N
cac2 bal	simC4	Y	0.466667	N
cac2 bal	simC4	Y	0.4	N
cac2 bal	simC4	Y	0.566667	N
cac2 bal	simC4	Y	0.3	N
cac2 bal	simC4	N
cac2 bal	simC4	Y	0.866667	N
cac2 bal	simC4	Y	0.533333	N
cac2 bal	simC4	Y	0.466667	N
cac2 bal	simC4	Y	0.4	N
cac2 RNAi	canS	Y	1	Y
cac2 RNAi	canS	Y	1	Y
cac2 RNAi	canS	Y	1	Y
cac2 RNAi	canS	Y	0.566667	N
cac2 RNAi	canS	Y	1	Y
cac2 RNAi	canS	Y	1	Y
cac2 RNAi	canS	Y	1	Y
cac2 RNAi	canS	Y	1	Y
cac2 RNAi	canS	Y	1	Y
cac2 RNAi	canS	Y	1	Y
cac2 RNAi	canS	Y	0.777778	Y
cac2 RNAi	canS	Y	0.866667	Y
cac2 RNAi	canS	Y	0.833333	Y
cac2 RNAi	canS	Y	0.388889	Y
cac2 RNAi	canS	Y	0.909091	Y
cac2 RNAi	canS	Y	0.857143	Y
cac2 RNAi	canS	Y	0.444444	Y
cac2 RNAi	canS	Y	0.8	Y
cac2 RNAi	canS	Y	0.5	Y
cac2 RNAi	canS	Y	0.571429	Y
cac2 RNAi	simC4	N
cac2 RNAi	simC4	Y	0.766667	N
cac2 RNAi	simC4	N	0.1	N
cac2 RNAi	simC4	Y	0.4	N
cac2 RNAi	simC4	Y	0.466667	N
cac2 RNAi	simC4	N
cac2 RNAi	simC4	N
cac2 RNAi	simC4	Y	0.5	N
cac2 RNAi	simC4	N
cac2 RNAi	simC4	Y	0.3	N
cac2 RNAi	simC4	N	0.1	N
cac2 RNAi	simC4	N	0.0333333	N
cac2 RNAi	simC4	N
cac2 RNAi	simC4	N	0.0666667	N
cac2 RNAi	simC4	N
cac2 RNAi	simC4	2 FEMALES	0.0333333	N
cac2 RNAi	simC4	N	0.1	N
cac2 RNAi	simC4	N
cac2 RNAi	simC4	Y	0.133333	N
cac2 RNAi	simC4	N
Ir11a balancer	canS	Y	1	Y
Ir11a balancer	canS	Y	0.5	Y
Ir11a balancer	canS	Y	0.571429	Y
Ir11a balancer	canS	Y	1	Y
Ir11a balancer	canS	Y	1	Y
Ir11a balancer	canS	Y	0.75	Y
Ir11a balancer	canS	Y	0.666667	Y
Ir11a balancer	canS	Y	1	Y
Ir11a balancer	canS	Y	1	Y
Ir11a balancer	canS	Y	0.333333	Y
Ir11a balancer	canS	Y	1	Y
Ir11a balancer	canS	Y	0.888889	Y
Ir11a balancer	canS	Y	1	Y
Ir11a balancer	canS	Y	0.285714	Y
Ir11a balancer	canS	Y	0.6	Y
Ir11a balancer	simC4	Y	0.833333	N
Ir11a balancer	simC4	Y	0.833333	N
Ir11a balancer	simC4	N
Ir11a balancer	simC4	Y	0.966667	N
Ir11a balancer	simC4	Y	0.933333	N
Ir11a balancer	simC4	Y	0.466667	N
Ir11a balancer	simC4	Y	0.533333	N
Ir11a balancer	simC4	Y	0.733333	N
Ir11a balancer	simC4	Y	0.733333	N
Ir11a balancer	simC4	Y	0.933333	N
Ir11a balancer	simC4	Y	0.7	N
Ir11a balancer	simC4	Y	0.266667	N
Ir11a balancer	simC4	Y	0.7	N
Ir11a balancer	simC4	Y	0.566667	N
Ir11a balancer	simC4	Y	0.266667	N
Ir11a balancer	simC4	Y	0.166667	N
Ir11a RNAi	canS	Y	0.375	Y
Ir11a RNAi	canS	Y	0.8	Y
Ir11a RNAi	canS	Y	0.75	Y
Ir11a RNAi	canS	Y	1	Y
Ir11a RNAi	canS	Y	0.75	Y
Ir11a RNAi	canS	Y	1	Y
Ir11a RNAi	canS	Y	0.5	Y
Ir11a RNAi	canS	Y	0.666667	Y
Ir11a RNAi	canS	Y	0.6	N
Ir11a RNAi	canS	Y	1	Y
Ir11a RNAi	canS	Y	0.666667	Y
Ir11a RNAi	canS	Y	1	Y
Ir11a RNAi	canS	Y	0.454545	Y
Ir11a RNAi	canS	Y	0.75	Y
Ir11a RNAi	canS	Y	0.571429	Y
Ir11a RNAi	canS	Y	1	Y
Ir11a RNAi	simC4	Y	0.3	N
Ir11a RNAi	simC4	Y	0.2	N
Ir11a RNAi	simC4	Y	0.2	N
Ir11a RNAi	simC4	Y	0.266667	N
Ir11a RNAi	simC4	Y	0.733333	N
Ir11a RNAi	simC4	Y	0.233333	N
Ir11a RNAi	simC4	Y	0.233333	N
Ir11a RNAi	simC4	Y	0.266667	N
Ir11a RNAi	simC4	Y	0.133333	N
Ir11a RNAi	simC4	Y	0.3	N
Ir11a RNAi	simC4	Y	0.166667	N
Ir11a RNAi	simC4	Y	0.133333	N
Ir11a RNAi	simC4	N	0.0333333	N
Ir11a RNAi	simC4	Y	0.133333	Y
Ir11a RNAi	simC4	N	0.0666667	N
Ten-a hybrid	canS	Y	0.466667	N
Ten-a hybrid	canS	N
Ten-a hybrid	canS	N
Ten-a hybrid	canS	N	0.0333333	N
Ten-a hybrid	canS	dead male
Ten-a hybrid	canS	N
Ten-a hybrid	canS	N
Ten-a hybrid	canS	N
Ten-a hybrid	canS	N
Ten-a hybrid	canS	N
Ten-a hybrid	canS	N
Ten-a hybrid	canS	N
Ten-a hybrid	canS	N
ten-A hybrid	canS	N
ten-A hybrid	canS	Y	0.2
ten-A hybrid	canS	Y	0.166667
ten-A hybrid	canS	Y	0.833333
ten-A hybrid	canS	N
ten-A hybrid	canS	N
ten-A hybrid	canS	Y	0.954545
ten-A hybrid	canS	N
ten-A hybrid	canS	Y	0.166667
ten-A hybrid	canS	Y	0.894737
ten-A hybrid	canS	N	0.1
ten-A hybrid	canS	Y	0.2
ten-A hybrid	canS	Y	0.3
Ten-a hybrid	simC4	N
Ten-a hybrid	simC4	N
Ten-a hybrid	simC4	N
Ten-a hybrid	simC4	N
Ten-a hybrid	simC4	N
Ten-a hybrid	simC4	N
Ten-a hybrid	simC4	N	0.1	N
Ten-a hybrid	simC4	N
Ten-a hybrid	simC4	N
Ten-a hybrid	simC4	N
Ten-a hybrid	simC4	N
Ten-a hybrid	simC4	Y	0.4	N
Ten-a hybrid	simC4	N
ten-A hybrid	simC4	Y	0.233333
ten-A hybrid	simC4	N
ten-A hybrid	simC4	Y	0.5
ten-A hybrid	simC4	Y	1
ten-A hybrid	simC4	Y	0.333333
ten-A hybrid	simC4	N	0.1
ten-A hybrid	simC4	Y	0.466667
ten-A hybrid	simC4	N	0.0333333
ten-A hybrid	simC4	N	0.0333333
ten-A hybrid	simC4	Y	0.4
ten-A hybrid	simC4	N	0.0333333
ten-A hybrid	simC4	N
ten-A hybrid	simC4	Y	0.5
pde9 hybrid	canS	Y	0.133333	N
pde9 hybrid	canS	Y	0.266667	N
pde9 hybrid	canS	Y	0.266667	N
pde9 hybrid	canS	Y	0.233333	N
pde9 hybrid	canS	Y	0.2	N
pde9 hybrid	canS	Y	0.2	N
pde9 hybrid	canS	Y	0.2	N
pde9 hybrid	canS	N
pde9 hybrid	canS	Y	0.166667	N
pde9 hybrid	canS	Y	0.4	N
pde9 hybrid	canS	Y	0.4	N
pde9 hybrid	canS	Y	0.433333	N
pde9 hybrid	canS	N	0.0333333	N
pde9 hybrid	canS	N
pde9 hybrid	canS	Y	0.333333	N
pde9 hybrid	canS	Y	0.366667	N
pde9 hybrid	canS	Y	0.4	N
pde9 hybrid	canS	N	0.0333333	N
pde9 hybrid	canS	N
pde9 hybrid	canS	Y	0.433333	N
pde9 hybrid	canS	Y	0.233333	N
pde9 hybrid	canS	Y	0.366667	N
pde9 hybrid	canS	Y	0.366667	N
pde9 hybrid	canS	Y	0.133333	N
pde9 hybrid	simC4	Y	0.866667	N
pde9 hybrid	simC4	Y	0.366667	N
pde9 hybrid	simC4	Y	0.366667	N
pde9 hybrid	simC4	Y	0.2	N
pde9 hybrid	simC4	Y	0.8	N
pde9 hybrid	simC4	Y	0.133333	N
pde9 hybrid	simC4	Y	0.4	N
pde9 hybrid	simC4	N
pde9 hybrid	simC4	Y	0.533333	N
pde9 hybrid	simC4	Y	0.333333	N
pde9 hybrid	simC4	Y	0.233333	N
pde9 hybrid	simC4	Y	0.166667	N
pde9 hybrid	simC4	N	0.0333333	N
pde9 hybrid	simC4	N	0.0666667	N
pde9 hybrid	simC4	N	0.0333333	N
pde9 hybrid	simC4	N	0.0333333	N
pde9 hybrid	simC4	Y	0.333333	N
pde9 hybrid	simC4	N	0.0333333	N
pde9 hybrid	simC4	Y	0.466667	N
pde9 hybrid	simC4	N
pde9 hybrid	simC4	Y	0.633333	N
pde9 hybrid	simC4	N
pde9 hybrid	simC4	N
smr bal (way+)	canS	Y	0.166667	N
smr bal (way+)	canS	N	0.0333333	N
smr bal (way+)	canS	Y	0.166667	N
smr bal (way+)	canS	Y	0.5	N
smr bal (way+)	canS	N
smr bal (way+)	canS	N	0.0333333	N
smr bal (way+)	canS	Y	0.533333	N
smr bal (way+)	canS	Y	0.133333	N
smr bal (way+)	canS	N
smr bal (way+)	canS	N
smr bal (way+)	canS	N
smr bal (way+)	canS	N	0.0333333	N
smr bal (way+)	canS	N	0.0333333	N
smr bal (way+)	canS	Y	0.461538	Y
smr bal (way+)	canS	N
smr bal (way+)	canS	Y	0.133333	N
smr bal (way+)	canS	N	0.0333333	N
smr bal (way+)	canS	N	0.0333333	N
smr bal (way+)	canS	Y	0.333333	N
smr bal (way+)	canS	Y	0.266667	N
smr bal (way+)	canS	N
smr bal (way+)	canS	N	0.0333333	N
smr bal (way+)	canS	N	0.1	N
smr bal (way+)	simC4	N
smr bal (way+)	simC4	N
smr bal (way+)	simC4	N
smr bal (way+)	simC4	N
smr bal (way+)	simC4	N
smr bal (way+)	simC4	N
smr bal (way+)	simC4	Y	0.433333	N
smr bal (way+)	simC4	N	0.0333333	N
smr bal (way+)	simC4	N
smr bal (way+)	simC4	N	0.1	N
smr bal (way+)	simC4	Y	0.733333	N
smr bal (way+)	simC4	Y	0.633333	N
smr bal (way+)	simC4	Y	0.6	N
smr bal (way+)	simC4	Y	0.3	N
smr bal (way+)	simC4	N	0.1	N
smr bal (way+)	simC4	Y	0.2	N
smr bal (way+)	simC4	N
smr bal (way+)	simC4	Y	0.566667	N
smr bal (way+)	simC4	N
smr bal (way+)	simC4	Y	0.2	N
smr bal (way+)	simC4	N	0.1	N
smr bal (way+)	simC4	N
smr hybrid (w-y-)	canS	MALE ESCAPED
smr hybrid (w-y-)	canS	N
smr hybrid (w-y-)	canS	N
smr hybrid (w-y-)	canS	Y	0.0666667	N
smr hybrid (w-y-)	canS	Y	0.866667	N
smr hybrid (w-y-)	canS	Y	0.266667	N
smr hybrid (w-y-)	canS	Y	0.8	N
smr hybrid (w-y-)	canS	Y	0.666667	N
smr hybrid (w-y-)	canS	Y	0.166667	N
smr hybrid (w-y-)	canS	Y	0.166667	N
smr hybrid (w-y-)	canS	Y	0.8	N
smr hybrid (w-y-)	canS	Y	0.826087	Y
smr hybrid (w-y-)	canS	Y	0.233333	N
smr hybrid (w-y-)	canS	Y	0.333333	N
smr hybrid (w-y-)	canS	Y	0.366667	N
smr hybrid (w-y-)	canS	Y	0.2	N
smr hybrid (w-y-)	canS	Y	0.433333	N
smr hybrid (w-y-)	canS	Y	0.266667	N
smr hybrid (w-y-)	canS	Y	0.266667	N
smr hybrid (w-y-)	canS	N
smr hybrid (w-y-)	simC4	N	0.0666667	N
smr hybrid (w-y-)	simC4	Y	0.3	N
smr hybrid (w-y-)	simC4	N
smr hybrid (w-y-)	simC4	Y	0.666667	N
smr hybrid (w-y-)	simC4	N	0.1	N
smr hybrid (w-y-)	simC4	Y	0.533333	N
smr hybrid (w-y-)	simC4	Y	0.566667	N
smr hybrid (w-y-)	simC4	Y	0.566667	N
smr hybrid (w-y-)	simC4	Y	0.466667	N
smr hybrid (w-y-)	simC4	Y	0.2	N
smr hybrid (w-y-)	simC4	Y	0.133333	N
smr hybrid (w-y-)	simC4	Y	0.533333	N
smr hybrid (w-y-)	simC4	Y	0.766667	N
smr hybrid (w-y-)	simC4	Y	0.533333	N
smr hybrid (w-y-)	simC4	Y	0.5	N
smr hybrid (w-y-)	simC4	Y	0.233333	N
smr hybrid (w-y-)	simC4	Y	0.6	N
smr hybrid (w-y-)	simC4	Y	0.0666667	N
smr hybrid (w-y-)	simC4	Y	0.466667	N
smr hybrid (w-y-)	simC4	Y	0.4	N

## Sheet: cac perfuming
Male genotype	Female genotype	Court?	Proportion Time Spent Courting	Mate?
cac2 bal	simC4 + 7,11-HD	Y	0.633333	N
cac2 bal	simC4 + 7,11-HD	Y	0.666667	N
cac2 bal	simC4 + 7,11-HD	Y	0.966667	N
cac2 bal	simC4 + 7,11-HD	N	0.1	N
cac2 bal	simC4 + 7,11-HD	Y	1	N
cac2 bal	simC4 + 7,11-HD	N	0.1	N
cac2 bal	simC4 + 7,11-HD	Y	0.133333	N
cac2 bal	simC4 + 7,11-HD	N
cac2 bal	simC4 + 7,11-HD	Y	0.233333	N
cac2 bal	simC4 + 7,11-HD	N	0.0666667	N
cac2 bal	simC4 + 7,11-HD	Y	1	N
cac2 bal	simC4 + 7,11-HD	N
cac2 bal	simC4 + 7,11-HD	Y	1	N
cac2 bal	simC4 + 7,11-HD	Y	0.4	N
cac2 bal	simC4 + 7,11-HD	Y	0.766667	N
cac2 bal	simC4 + 7,11-HD	Y	1	N
cac2 bal	simC4 + 7,11-HD	N
cac2 bal	simC4 + sham	Y	0.3	N
cac2 bal	simC4 + sham	Y	0.3	N
cac2 bal	simC4 + sham	Y	1	N
cac2 bal	simC4 + sham	N
cac2 bal	simC4 + sham	Y	0.833333	N
cac2 bal	simC4 + sham	Y	0.733333	N
cac2 bal	simC4 + sham	N	0.0333333
cac2 bal	simC4 + sham	Y	0.933333	N
cac2 bal	simC4 + sham	N
cac2 bal	simC4 + sham	Y	0.433333	N
cac2 bal	simC4 + sham	Y	0.233333	N
cac2 bal	simC4 + sham	Y	0.633333	N
cac2 bal	simC4 + sham	Y	0.166667	N
cac2 bal	simC4 + sham	N
cac2 bal	simC4 + sham	N
cac2 bal	simC4 + sham	N
cac2 bal	simC4 + sham	Y	0.166667	N
cac2 RNAi	simC4 + 7,11-HD	Y	0.733333	N
cac2 RNAi	simC4 + 7,11-HD	Y	1	N
cac2 RNAi	simC4 + 7,11-HD	Y	0.966667	N
cac2 RNAi	simC4 + 7,11-HD	Y	0.3	N
cac2 RNAi	simC4 + 7,11-HD	Y	0.233333	N
cac2 RNAi	simC4 + 7,11-HD	Y	0.266667	N
cac2 RNAi	simC4 + 7,11-HD	Y	0.4	N
cac2 RNAi	simC4 + 7,11-HD	Y	0.966667	N
cac2 RNAi	simC4 + 7,11-HD	Y	1	N
cac2 RNAi	simC4 + 7,11-HD	Y	0.3	N
cac2 RNAi	simC4 + 7,11-HD	Y	0.933333	N
cac2 RNAi	simC4 + 7,11-HD	Y	0.133333	N
cac2 RNAi	simC4 + 7,11-HD	Y	1	N
cac2 RNAi	simC4 + 7,11-HD	Y	0.9	N
cac2 RNAi	simC4 + 7,11-HD	Y	0.833333	N
cac2 RNAi	simC4 + 7,11-HD	Y	1	N
cac2 RNAi	simC4 + 7,11-HD	Y	1	N
cac2 RNAi	simC4 + sham	Y	0.133333	N
cac2 RNAi	simC4 + sham	Y	0.133333	N
cac2 RNAi	simC4 + sham	N
cac2 RNAi	simC4 + sham	N
cac2 RNAi	simC4 + sham	N
cac2 RNAi	simC4 + sham	N
cac2 RNAi	simC4 + sham	N
cac2 RNAi	simC4 + sham	N	0.1	N
cac2 RNAi	simC4 + sham	N
cac2 RNAi	simC4 + sham	N	0.0333333	N
cac2 RNAi	simC4 + sham	N
cac2 RNAi	simC4 + sham	N	0.1	N
cac2 RNAi	simC4 + sham	Y	0.666667	N
cac2 RNAi	simC4 + sham	N	0.0333333	N
cac2 RNAi	simC4 + sham	MALE ESCAPED
cac2 RNAi	simC4 + sham	N
cac2 RNAi	simC4 + sham	N
canS	simC4 + 7,11-HD	Y	0.766667	N
canS	simC4 + 7,11-HD	Y	0.7	N
canS	simC4 + 7,11-HD	Y	1	N
canS	simC4 + 7,11-HD	Y	0.266667	N
canS	simC4 + 7,11-HD	Y	0.7	N
canS	simC4 + 7,11-HD	Y	0.866667	N
canS	simC4 + 7,11-HD	Y	0.966667	N
canS	simC4 + 7,11-HD	Y	0.633333	N
canS	simC4 + 7,11-HD	Y	0.433333	N
canS	simC4 + 7,11-HD	Y	0.966667	N
canS	simC4 + 7,11-HD	Y	0.433333	N
canS	simC4 + 7,11-HD	Y	0.4	N
canS	simC4 + 7,11-HD	Y	0.433333	N
canS	simC4 + 7,11-HD	Y	0.866667	N
canS	simC4 + 7,11-HD	Y	1	Y
canS	simC4 + 7,11-HD	Y	0.666667	N
canS	simC4 + 7,11-HD	Y	0.533333	N
canS	simC4 + sham	Y	0.166667	N
canS	simC4 + sham	Y	0.3	N
canS	simC4 + sham	N	0.0666667	N
canS	simC4 + sham	Y	0.9	N
canS	simC4 + sham	N
canS	simC4 + sham	Y	0.133333	N
canS	simC4 + sham	N	0.0333333	N
canS	simC4 + sham	Y	0.9	N
canS	simC4 + sham	N	0.0333333	N
canS	simC4 + sham	Y	1	N
canS	simC4 + sham	N	0.0333333	N
canS	simC4 + sham	N	0.0666667	N
canS	simC4 + sham	N	0.0333333	N
canS	simC4 + sham	N
canS	simC4 + sham	N
canS	simC4 + sham	N
canS	simC4 + sham	N
Lhr	simC4 + 7,11-HD	N
Lhr	simC4 + 7,11-HD	N
Lhr	simC4 + 7,11-HD	N
Lhr	simC4 + 7,11-HD	N
Lhr	simC4 + 7,11-HD	N
Lhr	simC4 + 7,11-HD	N
Lhr	simC4 + 7,11-HD	N
Lhr	simC4 + 7,11-HD	N
Lhr	simC4 + 7,11-HD	N
Lhr	simC4 + 7,11-HD	N
Lhr	simC4 + 7,11-HD	N
Lhr	simC4 + 7,11-HD	N
Lhr	simC4 + 7,11-HD	N
Lhr	simC4 + 7,11-HD	N
Lhr	simC4 + 7,11-HD	N
Lhr	simC4 + 7,11-HD	N
Lhr	simC4 + 7,11-HD	N
Lhr	simC4 + 7,11-HD	N
Lhr	simC4 + 7,11-HD	N
Lhr	simC4 + 7,11-HD	N
Lhr	simC4 + 7,11-HD	N
Lhr	simC4 + 7,11-HD	N
Lhr	simC4 + sham	Y	0.3	N
Lhr	simC4 + sham	Y	0.3	N
Lhr	simC4 + sham	N
Lhr	simC4 + sham	Y	0.266667	N
Lhr	simC4 + sham	N	0.1	N
Lhr	simC4 + sham	Y	0.266667	N
Lhr	simC4 + sham	N	0.1	N
Lhr	simC4 + sham	N	0.0333333	N
Lhr	simC4 + sham	Y	0.428571	Y
Lhr	simC4 + sham	N	0.0666667	N
Lhr	simC4 + sham	N
Lhr	simC4 + sham	Y	0.2	N
Lhr	simC4 + sham	Y	1	Y
Lhr	simC4 + sham	N
Lhr	simC4 + sham	N	0.1	N
Lhr	simC4 + sham	Y	0.833333	N
Lhr	simC4 + sham	Y	0.166667	N
Lhr	simC4 + sham	N	0.0333333	N
Lhr	simC4 + sham	Y	0.5	Y
Lhr	simC4 + sham	Y	0.466667	N
Lhr	simC4 + sham	Y	0.133333	N
